# Supplementary material for: Unique and Repeated Stwintrons (Spliceosomal Twin Introns) in the Hypoxylaceae
Source: MDPI journal article supplement (doi:10.3390/jof8040397), 2022-04-13
Supplement: s1 [file s1]

## **Supplementary Material (online)**

associated with

### **Unique and repeated stwintrons (spliceosomal twin introns) in the Hypoxylaceae**

Erzsébet Fekete<sup>1\*</sup>, Fruzsina Péntes<sup>1,2</sup>, Norbert Ág<sup>1</sup>, Viktória Ág-Rácz<sup>1,2</sup>, Erzsébet Sándor<sup>3</sup>, Claudio Scazzocchio<sup>4,5</sup>, Michel Flippin<sup>1</sup>, Levente Karaffa<sup>1,6</sup>

<sup>1</sup> Department of Biochemical Engineering, Faculty of Science and Technology, University of Debrecen, H-4032 Debrecen, Hungary

<sup>2</sup> Juhász-Nagy Pál Doctoral School of Biology and Environmental Sciences, University of Debrecen, H-4032 Debrecen, Hungary

<sup>3</sup> Institute of Food Science, Faculty of Agricultural and Food Science and Environmental Management, University of Debrecen, H-4032 Debrecen, Hungary

<sup>4</sup> Section of Microbiology, Department of Infectious Diseases, Imperial College London, London SW7 2AZ, UK

<sup>5</sup> Institute for Integrative Biology of the Cell (I2BC), Université Paris-Saclay, CEA and CNRS Unité Mixte de Recherche UMR 9198, 91190 Gif-sur-Yvette, France

<sup>6</sup> Institute of Metagenomics, University of Debrecen, H-4032 Debrecen, Hungary

\* Author for correspondence: kicsizsoka@yahoo.com

**Supplementary figure S1**

**Supplementary figure S2**

**Supplementary figure S3**

**Supplementary figure S4**

**Supplementary figure S5**

**Supplementary figure S6**

**Supplementary table S2**

**Supplementary table S3**

Supplementary table S1 is provided separately as an Excel file (Supplementary\_Table\_S1.xlsx): Identifiers, localisation, statistics and other information concerning 117 sister stwintrons and uniquely occurring [D1,2] stwintrons in *Hypoxylon* sp. CO27-5 and in 19 other Hypoxylaceae (2 sheets)

>Hypoxylon\_CO27-5  
CAGACACTCGATGA----g-----atattogatatatctcg-gagata-ctgga----ccttggttgctaactataga-tcagtatgtaccat-tggc-cacatatgttagggtgggcttctgcc--tacgatgtaa-c---cattctgctaaccatatgacctctcttcagTTCGCTCCAACCG

>H.pulicicidum  
CAGACACTTGATGA----ggttcgt-----atattcaacatatctcg-gagatc-ttaga----ctttcttagctaactgatat-ttagtatgttcttg---g-tcacaatcttatgatggactcctgtg--ctcgacttga-c---ctctctactaactgtgtacctctctc--tagTTCGCTTCAACCG

>Hypoxylon\_CI-4A  
GAAACTCTCGACGA----ggtttgt-----ataataagttgtccccc---gagctcgag---tattgtgtgctaactgaggc-ttagtatgttctgac-----tatttttttcaccgattactcctgac--tta-----gtatgtctgacaccatgattcttgctcagTTCACTTCAACCA

>Hypomontagnella.monticulosa  
GAGACACTTGATGA----ggttcgt-----accgtggaagtaaacca-actact-ttcggatgccctcttttgctaactaaagc-ttagtatgcttaaat-----gatggatcccagtggttctcctctgac--ttcaaagtaac----ttgttcactaacc-----gactacatagTTCCTCTCCAGCCA

>Jackrogersella.multiformis  
GCAACAATCGATGA----ggttcgt-----gcgcccagtagctatca-aacata-ataatgtaggcttggtttactaatttggac-ttagtatgcacccg----a-tgagattttcagaatacttccccgat--tacaacacag-c---ctgcccactaatcttattctacctcttcagTTCACTTCAGCCG

>Annulohypoxylon.stygium  
GCAACAATTGATGA----ggtttga-----gcgctaataatcctcca-gatcac-tgtgaactcgctgctttgctaactatcttt-tcagtatgcgcaatctgat-cacaatctttaagataatttcttcgg--tctcgattcgtc---ccgtctgctaattat-----ttctctctagTTCACTTCAGCCA

>Pyrenopolyporus.hunteri  
GAGACGCTCGATGA----ggttcgtgccgactggggttaaatatctc--gttattctgttt---tctaatttactaactttggc-ttagtatgtattagc-----ttcgggttctggacagcctgtccagt--tttagcggtagc---tgatatactgactattttaatgtgtcttcagTTCCTTCAGCCA

>Daldinia.childiae  
GAAACACTTGATGA----ggttcgt-----accatacgtattg---aatagcctgccggttattatatttgctaactgtaaa-ttagtatgcattct-----tttgtgtcctaggacaacccctgggt---cttaacgga-----atctctactaaccattttctctgtttctagTTCCTCTGCAACCT

>Entonaema.liquescens  
GAAACACTCGATGA----ggttcgt-----gacaataatatattg---aatatcttactg---tcataatttactaagatggggttagtatgcgttga-----tctaactcctaggaaggcctaccggc--cttaatggaa-----ctctctactaactatttcgctctgtcccagTTCCTCTGCAACCG

>H.rubiginosum  
GAAACACTCGATGA----ggttcgt-----gtggtctataccctcc-gataacattagg---tctcgtttactgacaatatt-tcagtatgcttttag---c-tcaagtttctaaagtgtattggcat-----ggcacactaactgtatgactttttcttagTTCGCTTCAACCC

>H.rickii  
GAAACTCTGACGAgtaaggttcgt-----gttgttgatatcccc--aatgagcccgga---tcattttgactaacaacggc-tcagtaagcataaat-----ctcagttcctagggtactcgcgaagt--cacggtgggat---attgatactaaccaaatgc-cccttcttagCTCTCTCCAACCA

>H.fragiforme  
GAGACACTTGATGAgtaaggtttgt-----gttatcaacatgtccc--gataattcgaag---ctacatttactaactactgc-ttagt-----ttcataggatatcctcgagtt--tgacaatgaaca---gaaaagctaaccacatgcttcgccttagCTCACTACAACCG

H.lienhwacheense  
GAAACCCTTGATGAgtgaggttcgt-----attgtcaagacgtcttatattcgctttagg---tgccatttgctaaataagcc-ttagtaacctaccgg--tg-accacttcttagagtatctgtccgat--cttgatataaccggttcacatattaaccaagtgtttctctattagTTCACTTCAACCG

>Xylaria.sp\_JS573  
GAAACGCTCGATGA----ggttagttgccaatccatctggatatt---aatgagttctaa---ttttactgactactcagtgctcagtatgacaccaatagtc-cacggatttcagagtcagtggtg-----tgacctgctaacagcgt-attgttttttagTTCCTTCCAACCG

>Xylaria.grammica  
GAAACCCTTGATGA----ggtttgt-----attactctgcagccccc-ggattgttttta---tatcacatgctaaggctat-atagtagctttcaacccta-ggtcattaataaattggt-----tcgaattggatc---tacettgctgacgtcagcctctgataatagCTCACTTCAACCA

>Xylaria.longipes  
CAAACCTCTTGATGA----ggtctgt-----attaattcgcgggttctc-aggtgttacttg---tataa-atgctaactgattctgttagtaaggctcaacccca-tgtcggaatcaaaccgac-----ttgaactggata---tgccctgctgacatagacttctgattatagTTCACTTCAACCT

>Rosellinia.necatrix  
GCGACCGTTGACGA----ggtccgt-----ataagctggttcattcocatcaatt-----tatcggtgctgacttcc--atagtatgctcctaatcctactattctcgccaggtcgat-----ccgaactccgta---tgctctgctaactactagcttttgactctagCTCTCTTCAACCG

>Arthrinium.malaysianum  
GAAACCCTTGATGA----ggttaagccgtcacttatttcggtctatac-----ggtgttttgctaattgtttct-ttagtatgtcatga-----aaccaagcccgtagtctgtgc-----agagatgcagac---cgctcgtctaactggtg---tgcatcaagTTCCTTGCAACCC

>Pestalotiopsis.fici  
GAGACGCTGGATGA----ggtgagt-----agaggagactttgttc-gtatgatgctgc---atgcaattgctaaccaaacttgtagtaagcatgata-----ccctctcogtggtcgacttatagctatagaccttgcat--gacttgactgacac-----gtgcttagTTCATTACAACCC

**Supplementary Figure S1.** Sequence alignment of stwintron number no-274 in orthologue genes for a monovalent cation:proton antiporter in species of *Xylariales* (*Hypoxylaceae*, *Xylariaceae*, and other families). In three species – *Hypoxylon rickii*, *H. lienhwacheense*, *H. fragiforme* – the phase two [D1,2] stwintron morphed into a phase two [D5,6] stwintron. The alignment was generated by MAFFT v.7 using E-INS-i iterative refinement and the 1PAM scoring matrix, with subsequent manual correction to properly align the 5’ exon-stwintron junction. Intronic sequences are in lower case letter. Conserved 5’-donor, 3’-acceptor and canonical BP elements are highlighted by the magenta (internal intron) or turquoise (external intron) background. Alternating codons are underlined in the exonic sequences (capitals) bordering the stwintron. In *H. rickii* and *H. lienhwacheense*, tetranucleotides directly downstream the intron fusion point (5’-AG|T) are reminiscent of a [D1,2] split donor sequence (5’-GTACGC and 5’-GTACCT, respectively) and are highlighted in yellow.

**a****A[2,3]**

uniquely occurring stwintrons [81]

sister stwintrons [38]

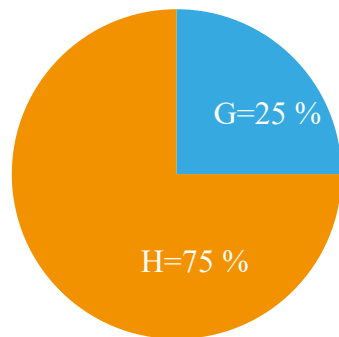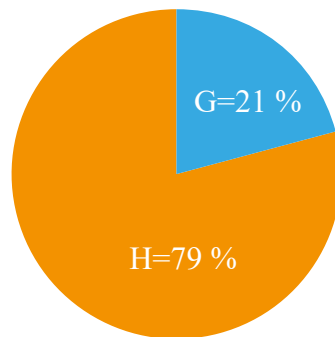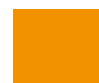

a [D1,2] stwintron but not an [A2,3] stwintron

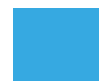

an alternatively spliced [D1,2]/[A2,3] stwintron

**b****Stwintron phase**

uniquely occurring stwintrons [81]

sister stwintrons [38]

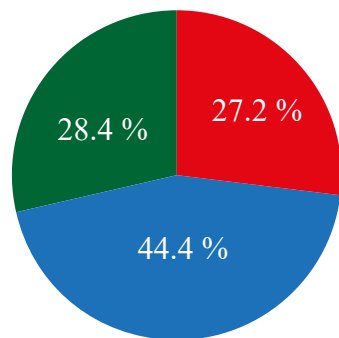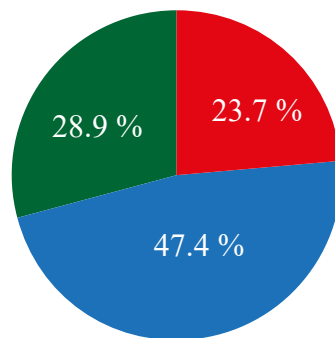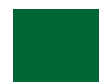

Two

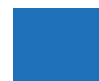

One

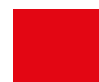

Zero

**Supplementary Figure S2.** Percentages of overlapping [D1,2] and [A2,3] stwintrons, and of stwintron phases. **(a)** The pie charts show the % of [A2,3] stwintrons in the miscellaneous group of the 81 UO stwintrons and that in the “control” group of the sister stwintrons (cf. [Fekete,2021]). **(b)** The pie charts show the phase distribution (in %) in the two groups of stwintrons. Most stwintrons are phase one (i.e., integrated between the first and second base of a codon) with a comparable distribution between the three phases in both groups of stwintrons.

# uniquely occurring stwintrons [81]

# sister stwintrons [38]

a

[D1,2] stwintrons

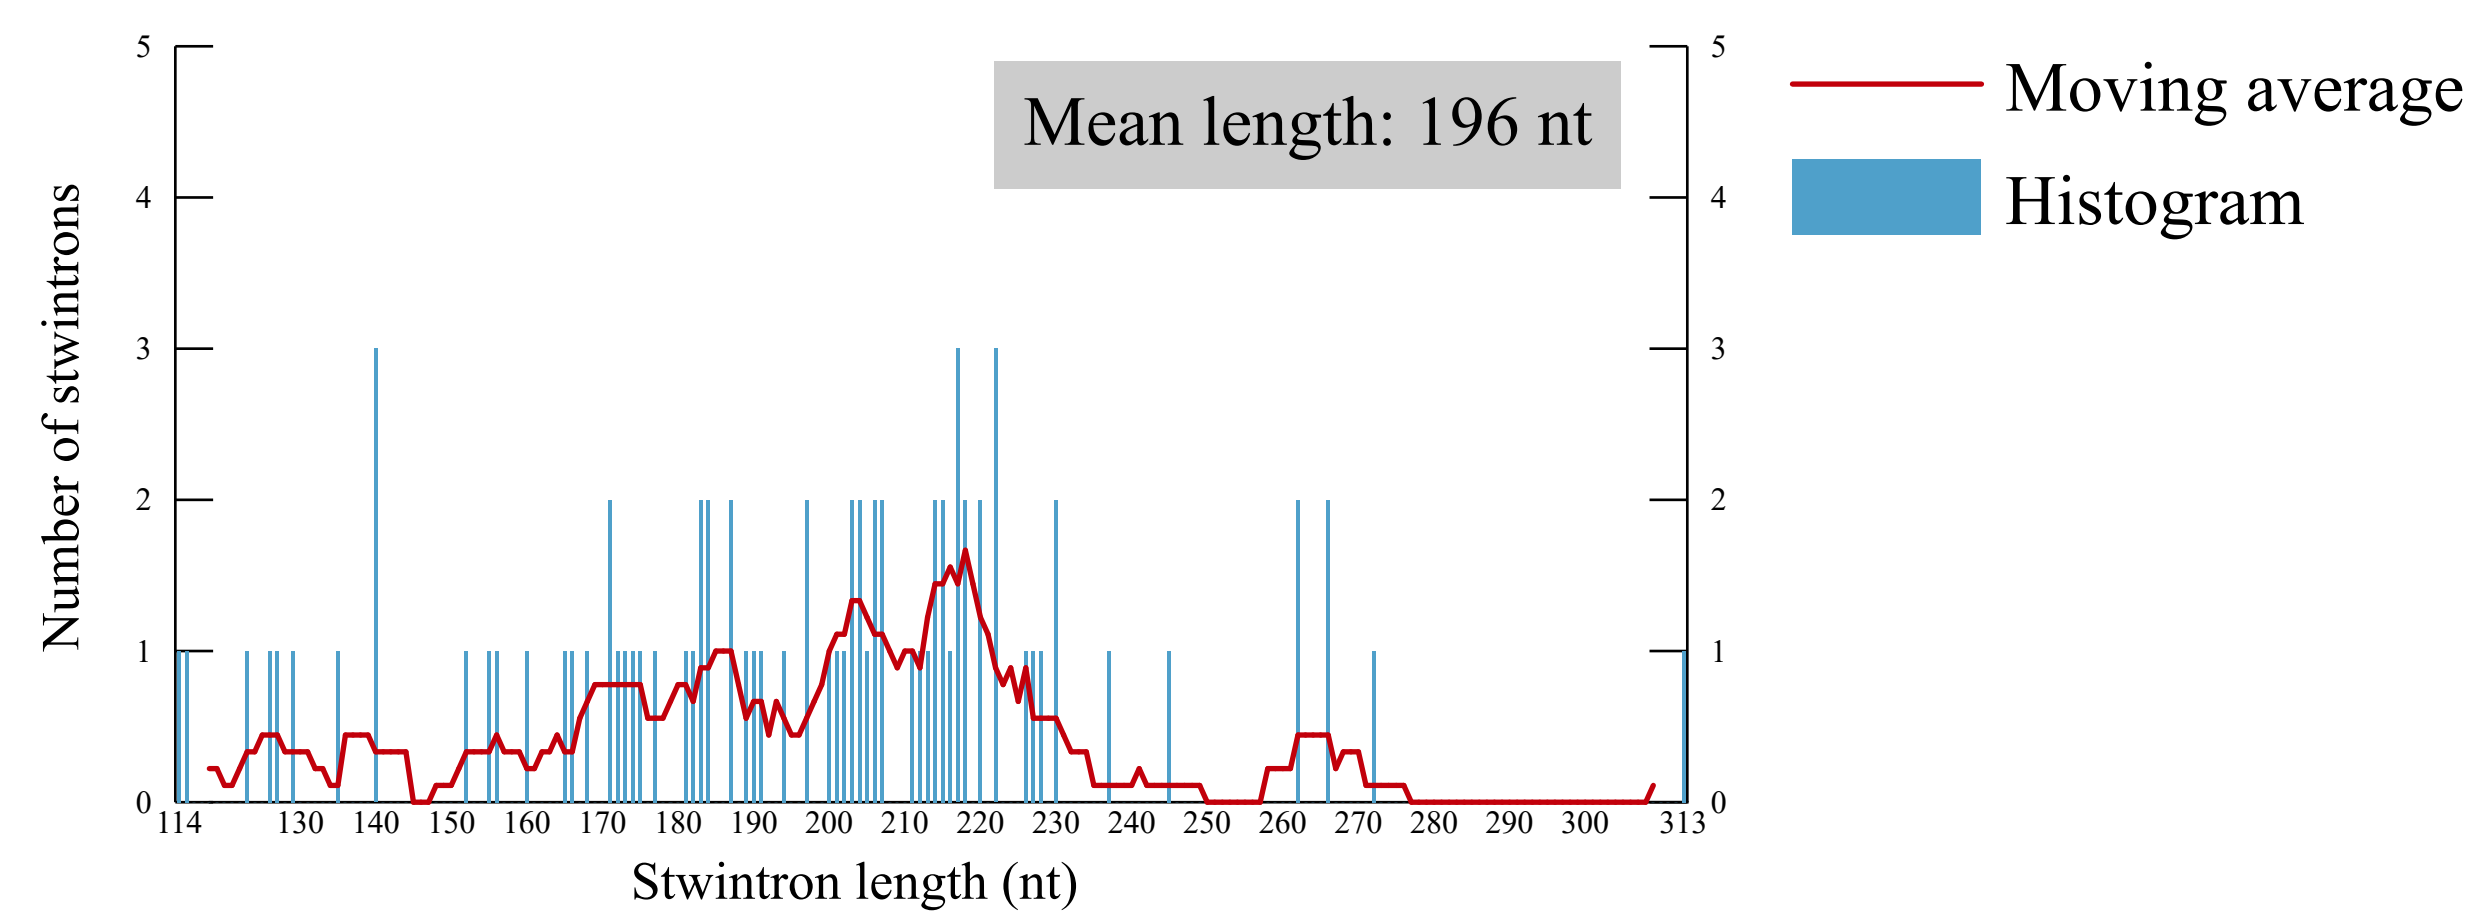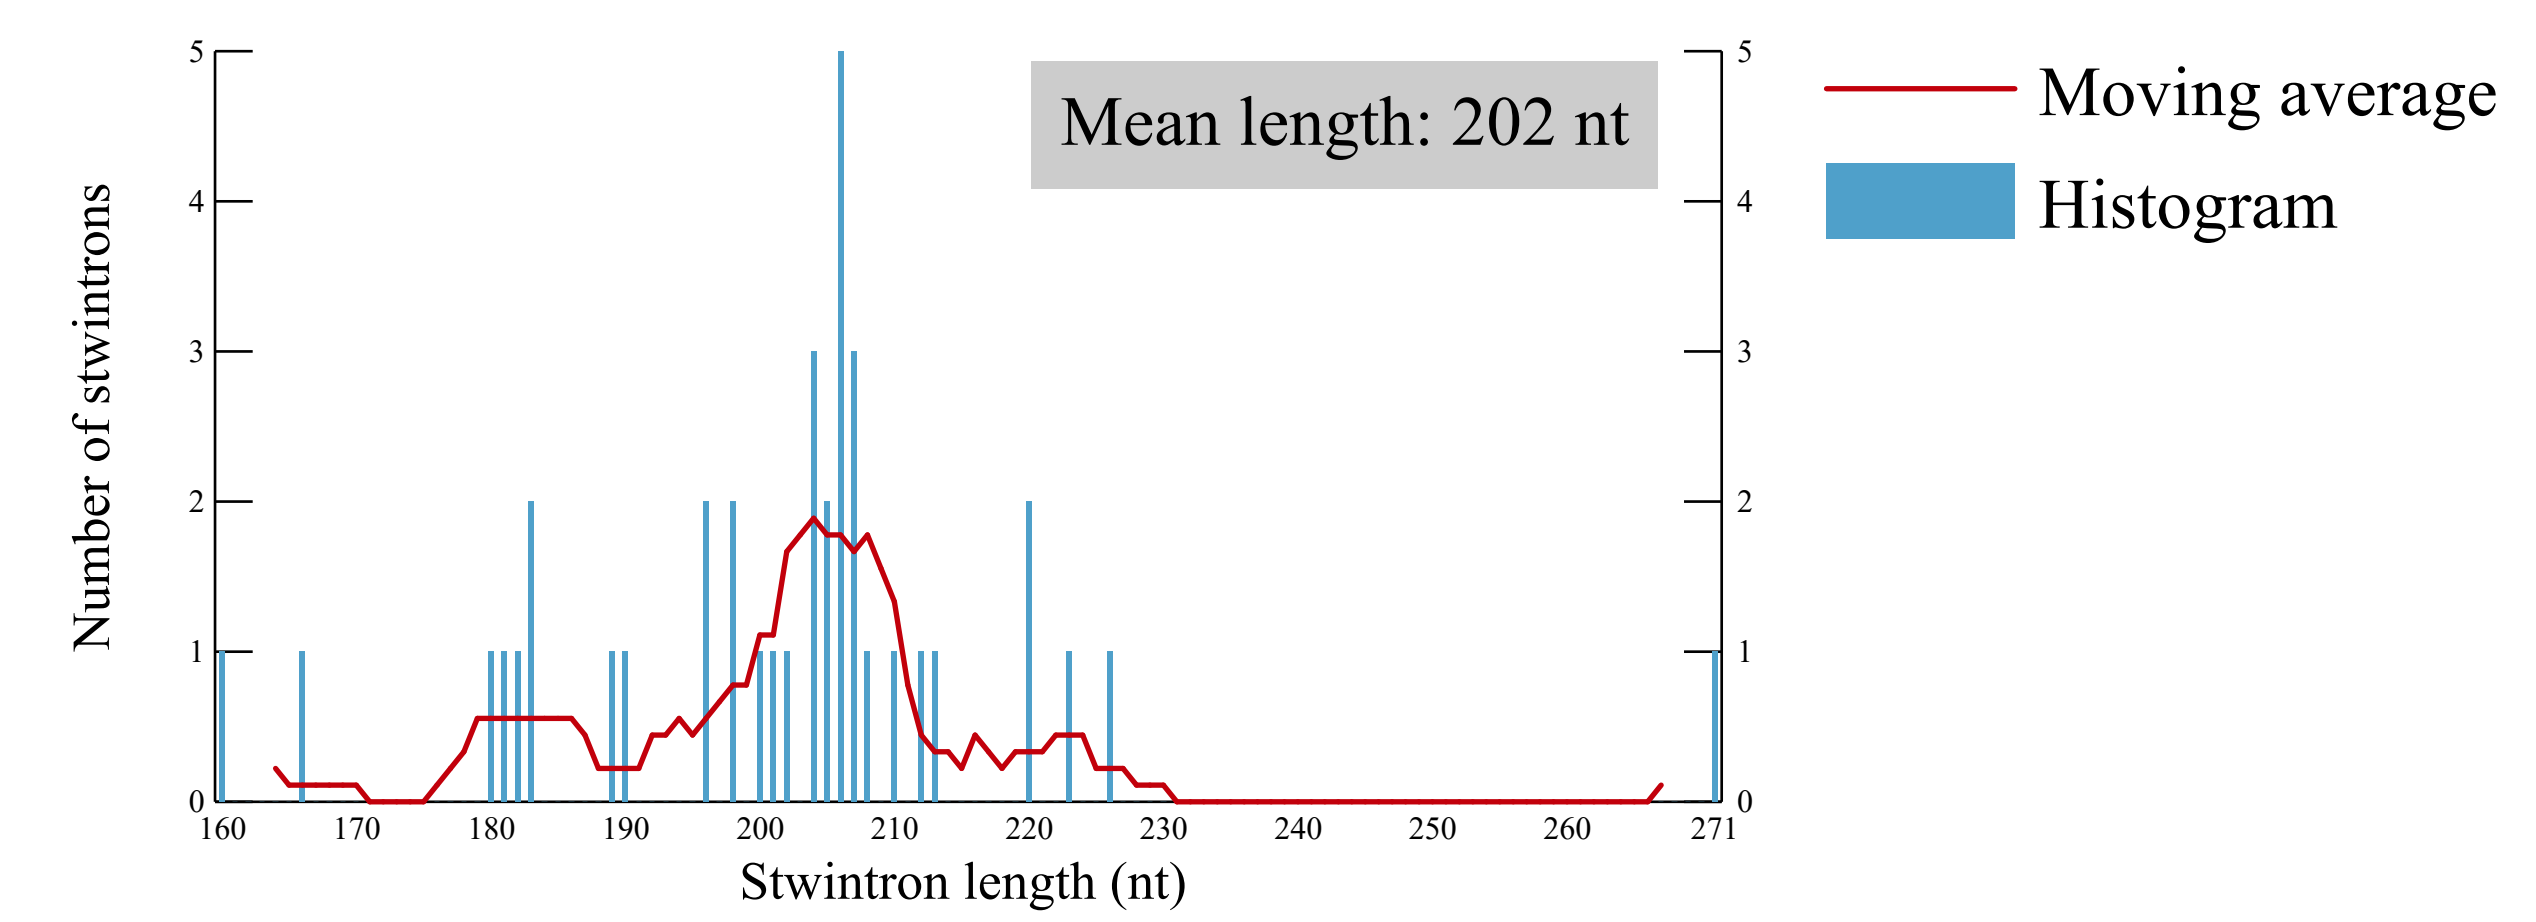

Internal introns

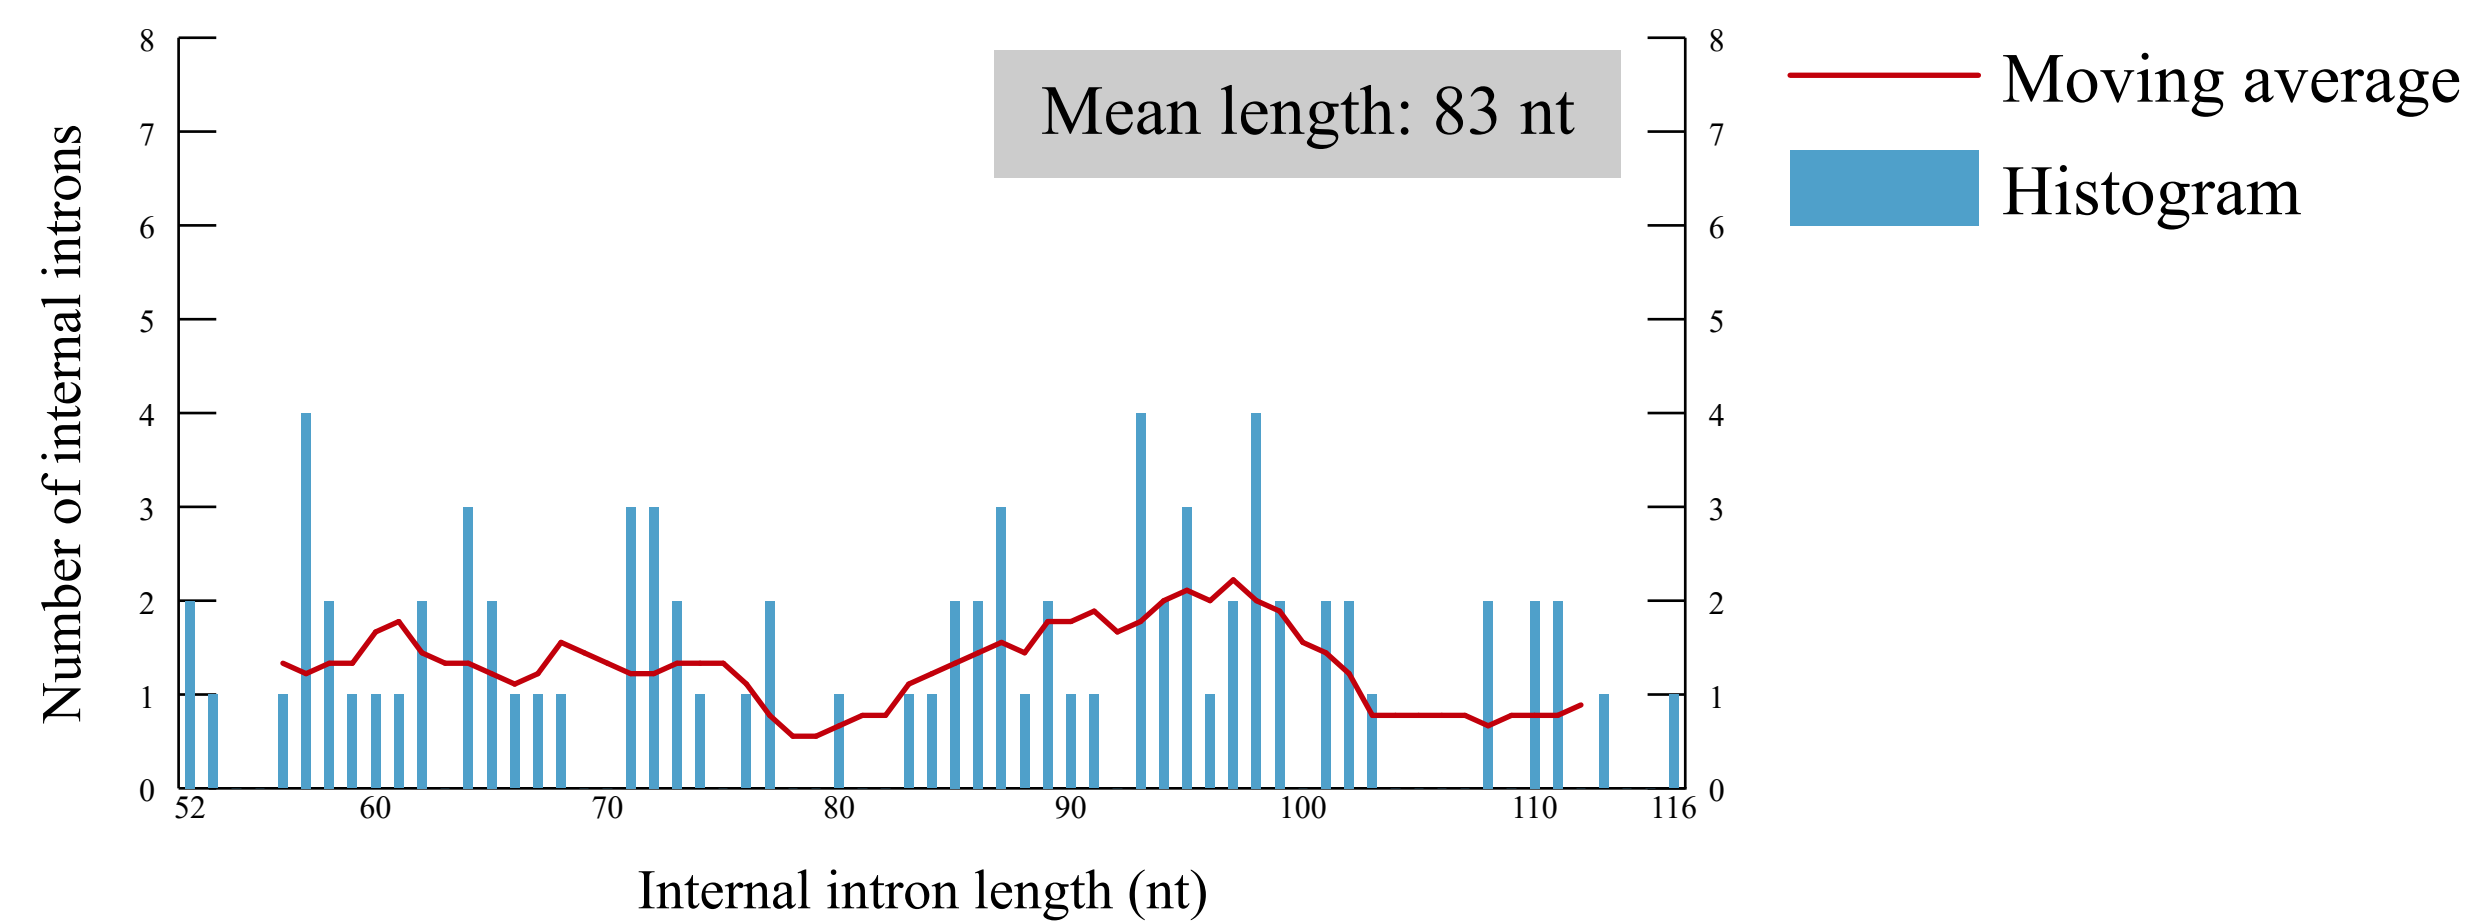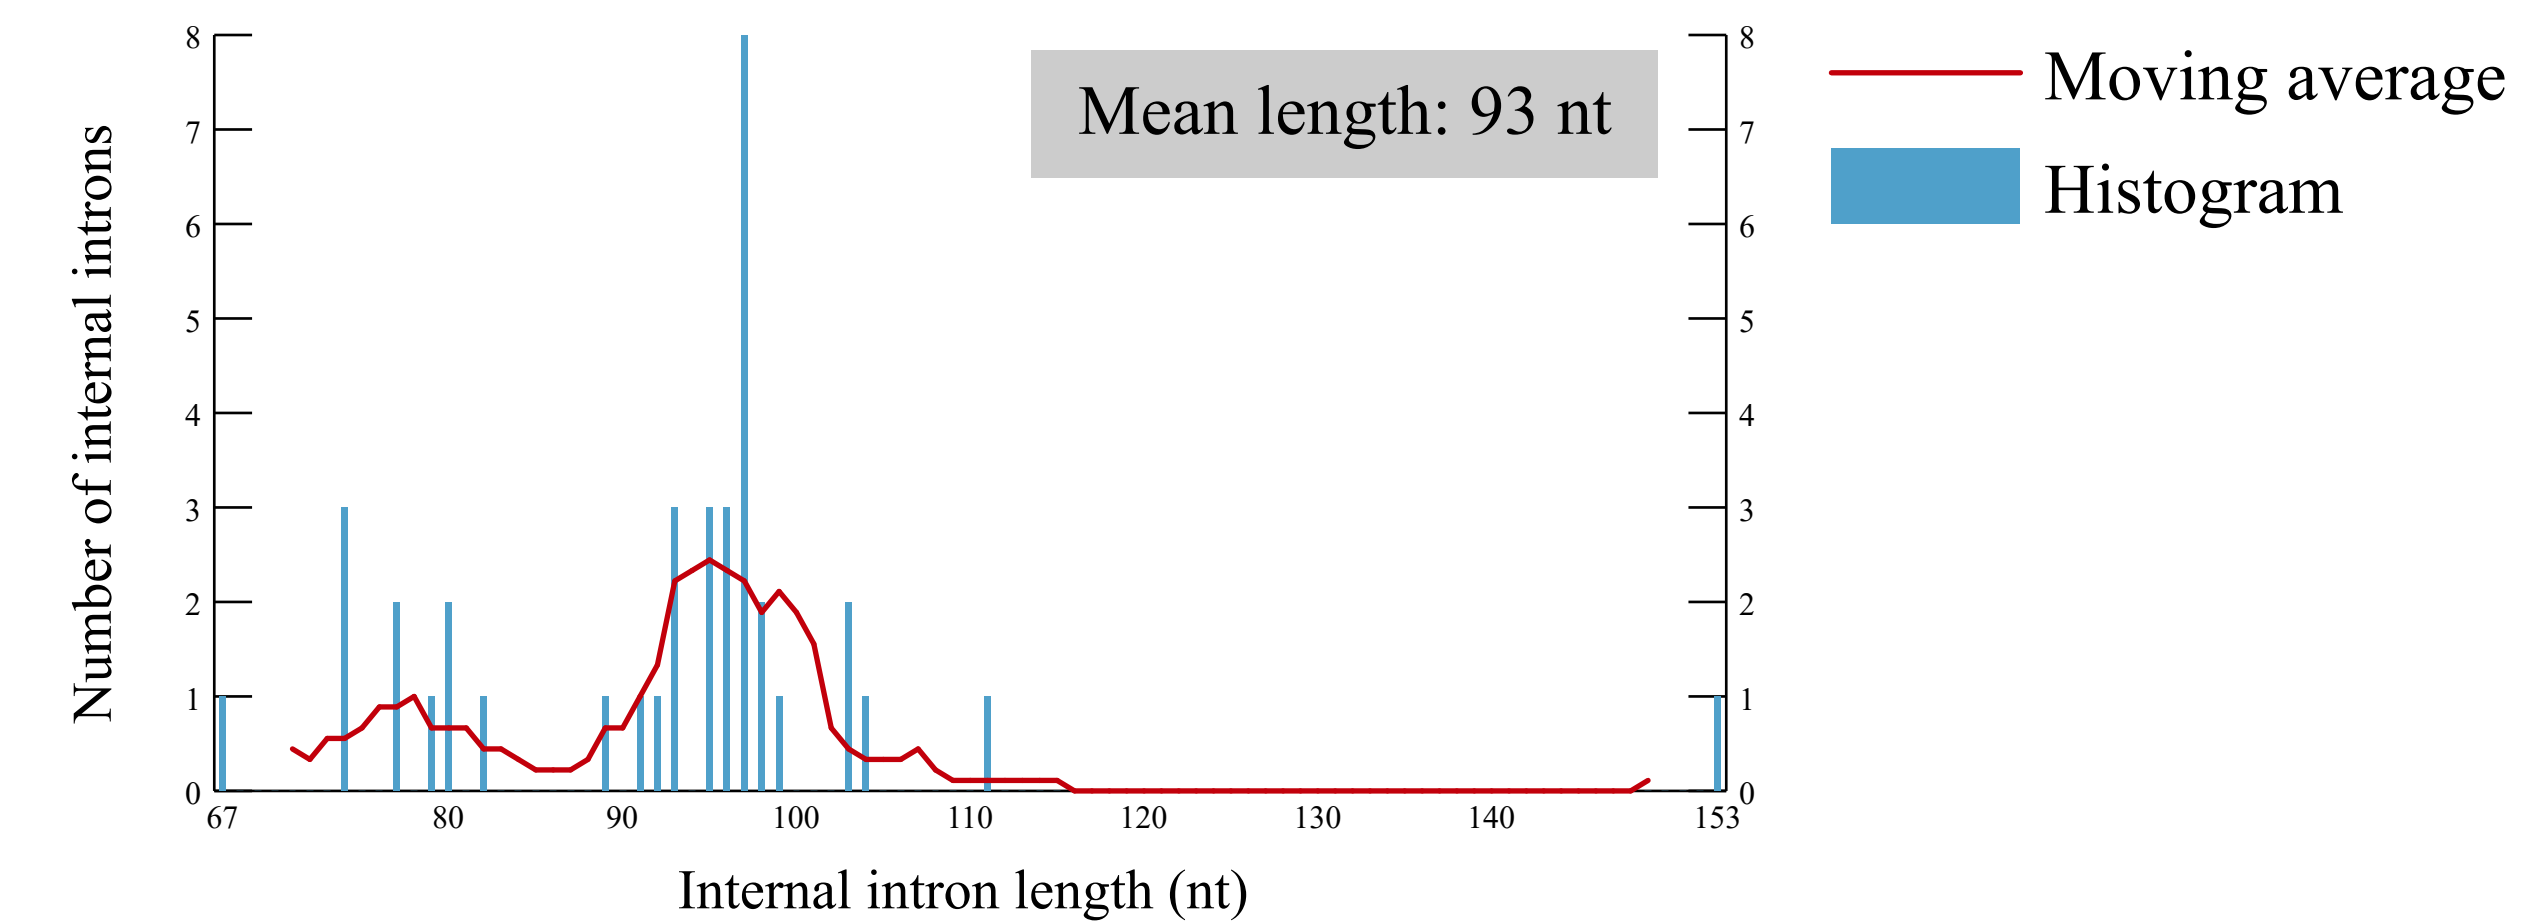

External introns

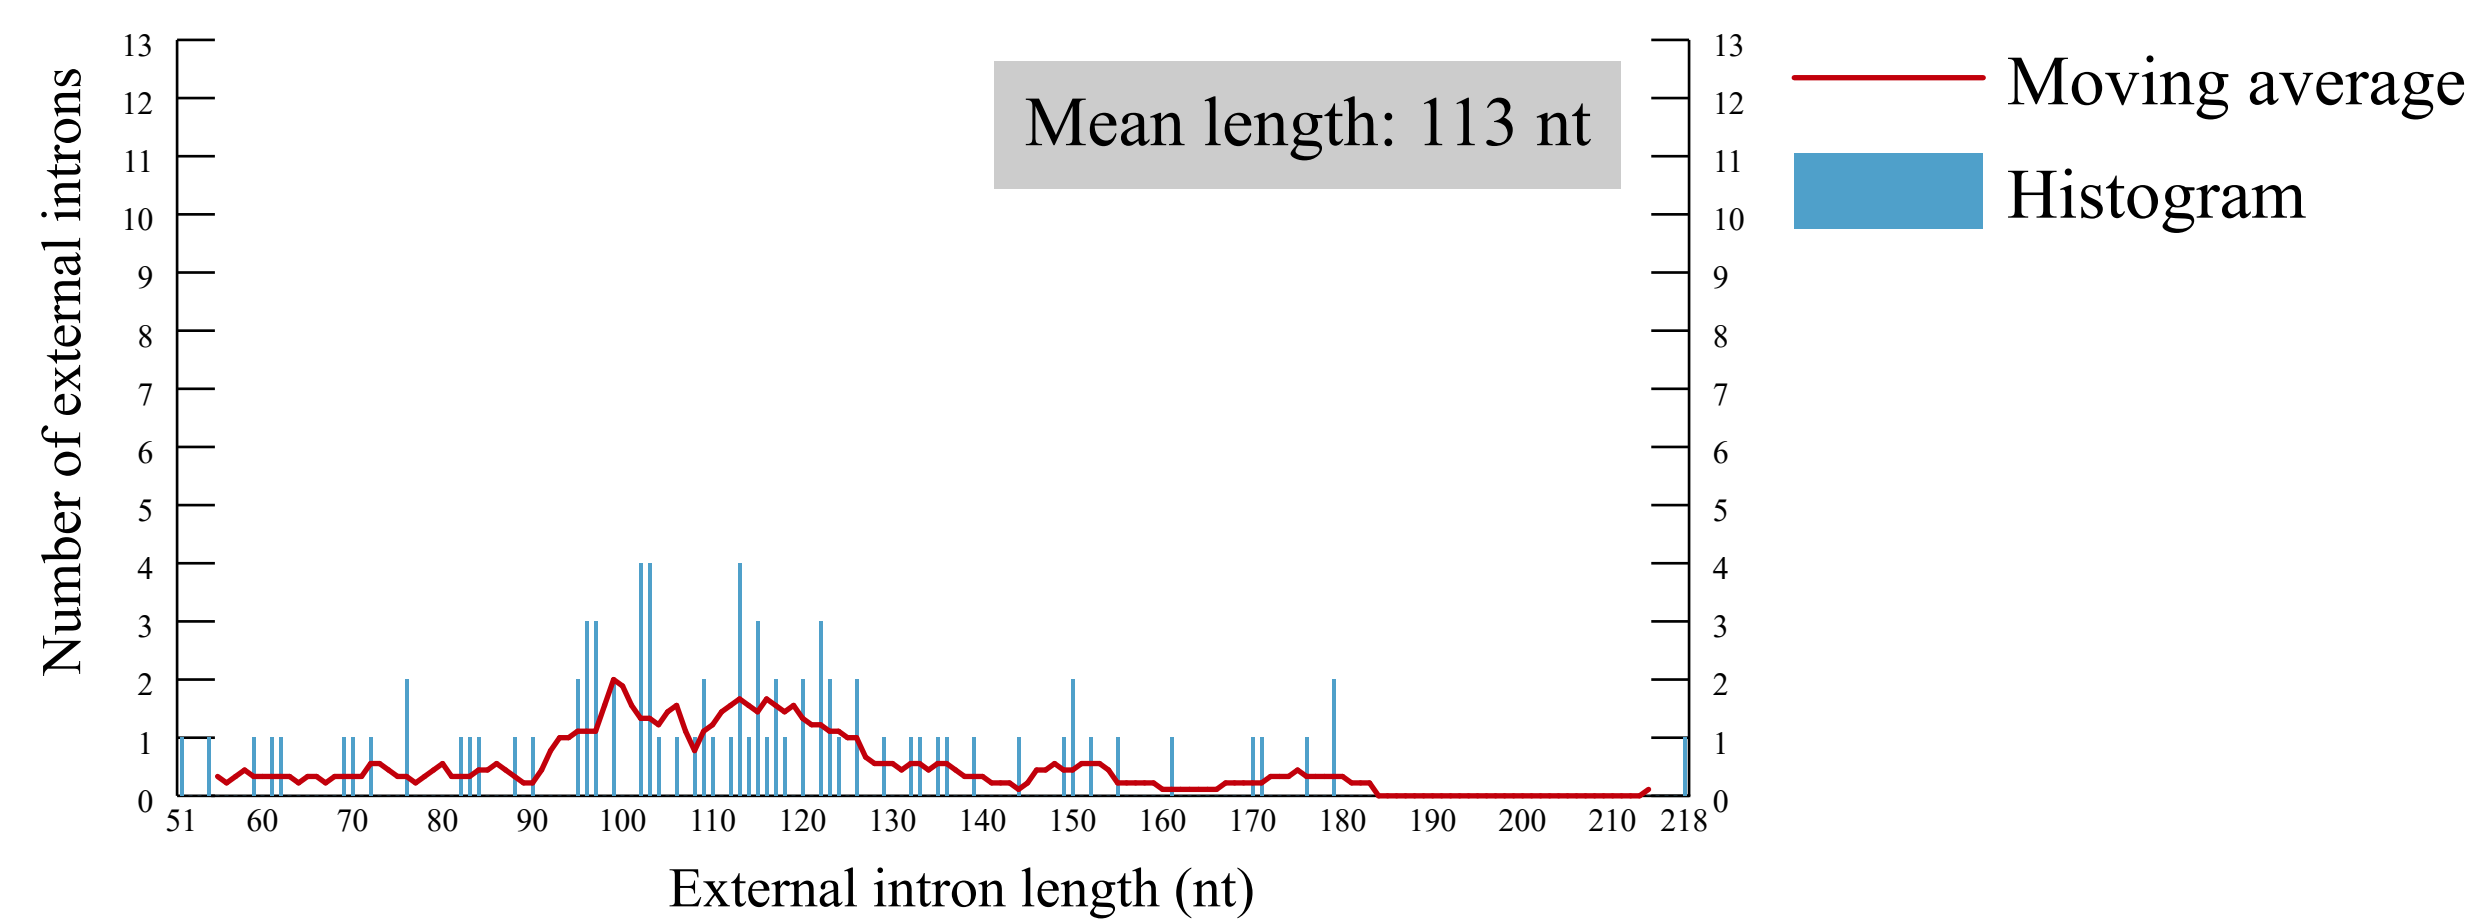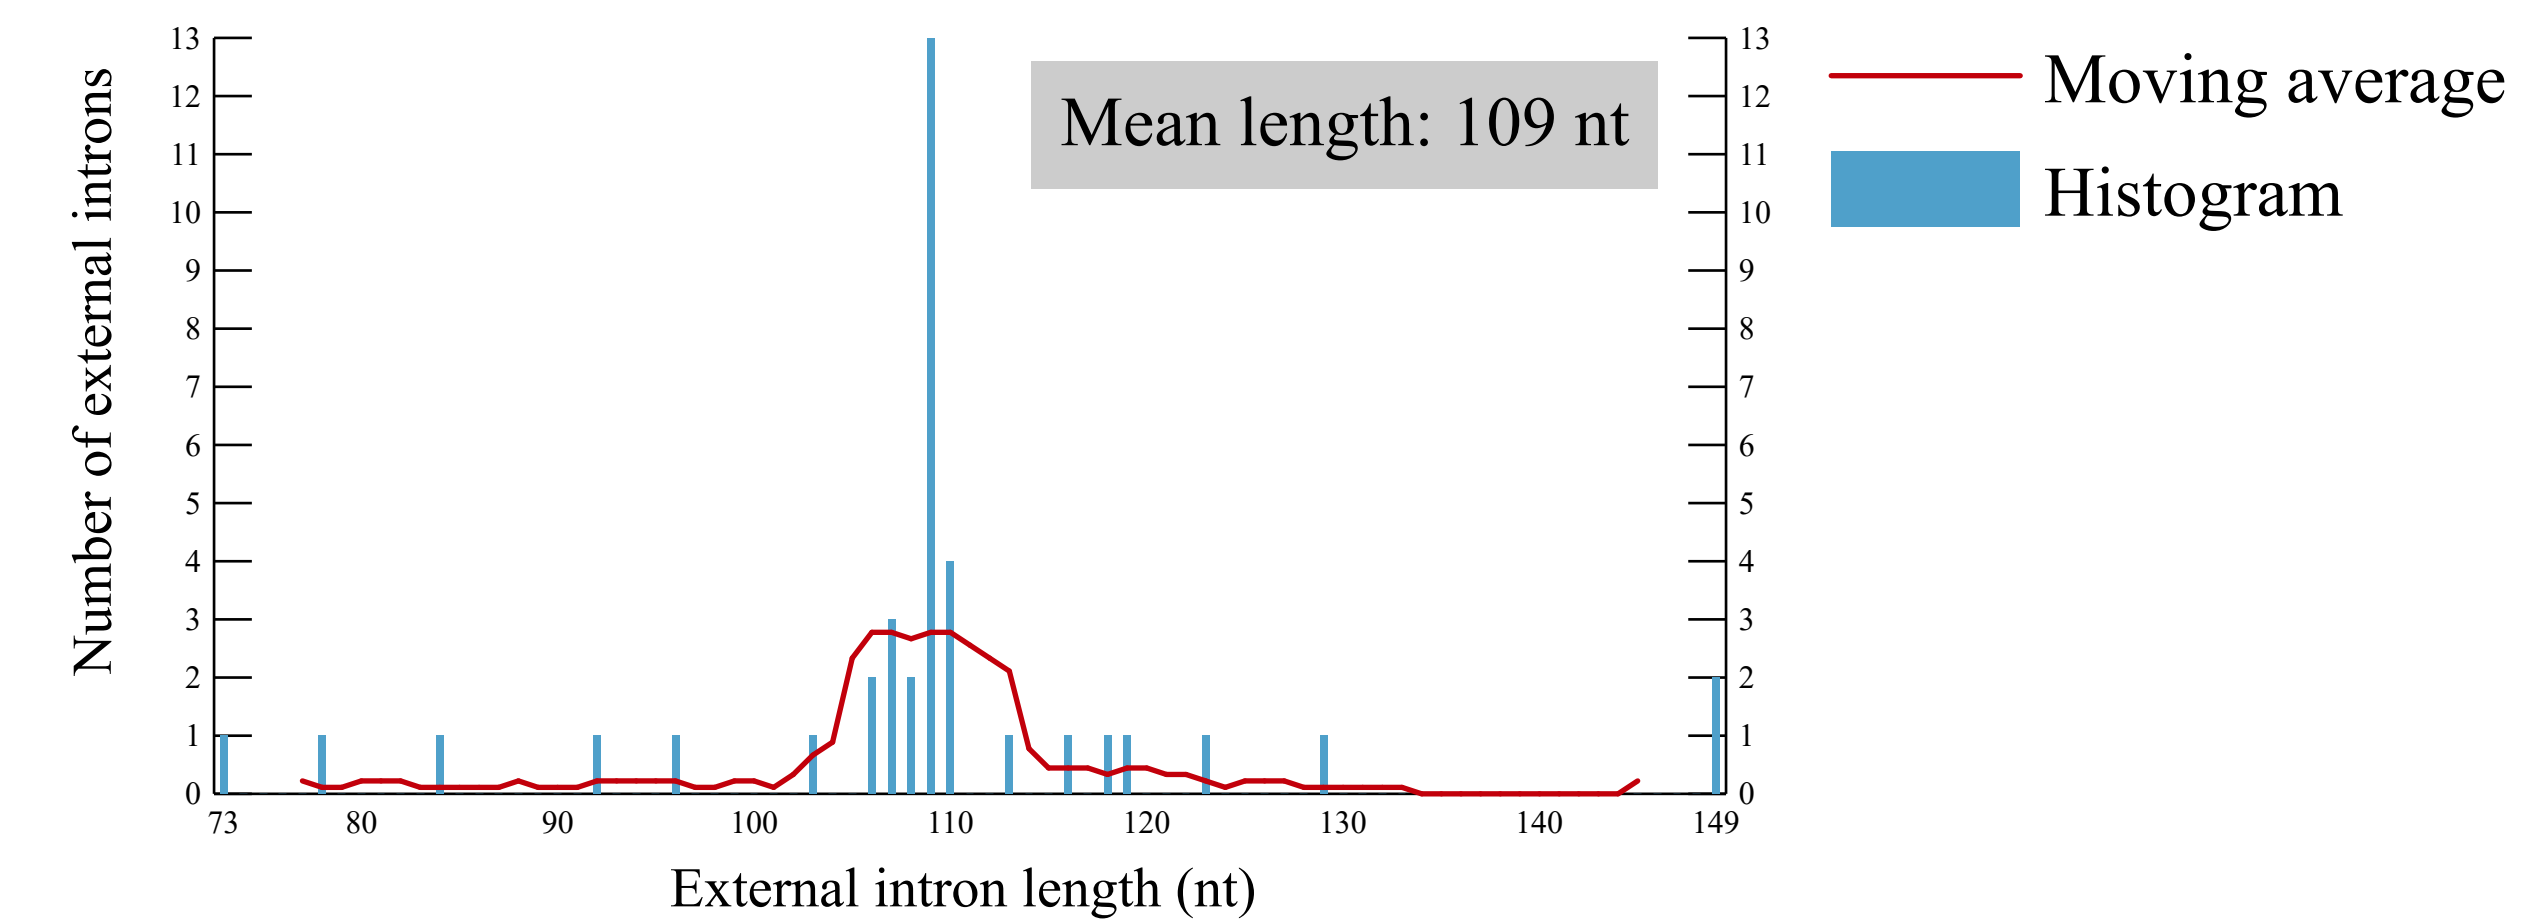

b

[D1,2] stwintrons

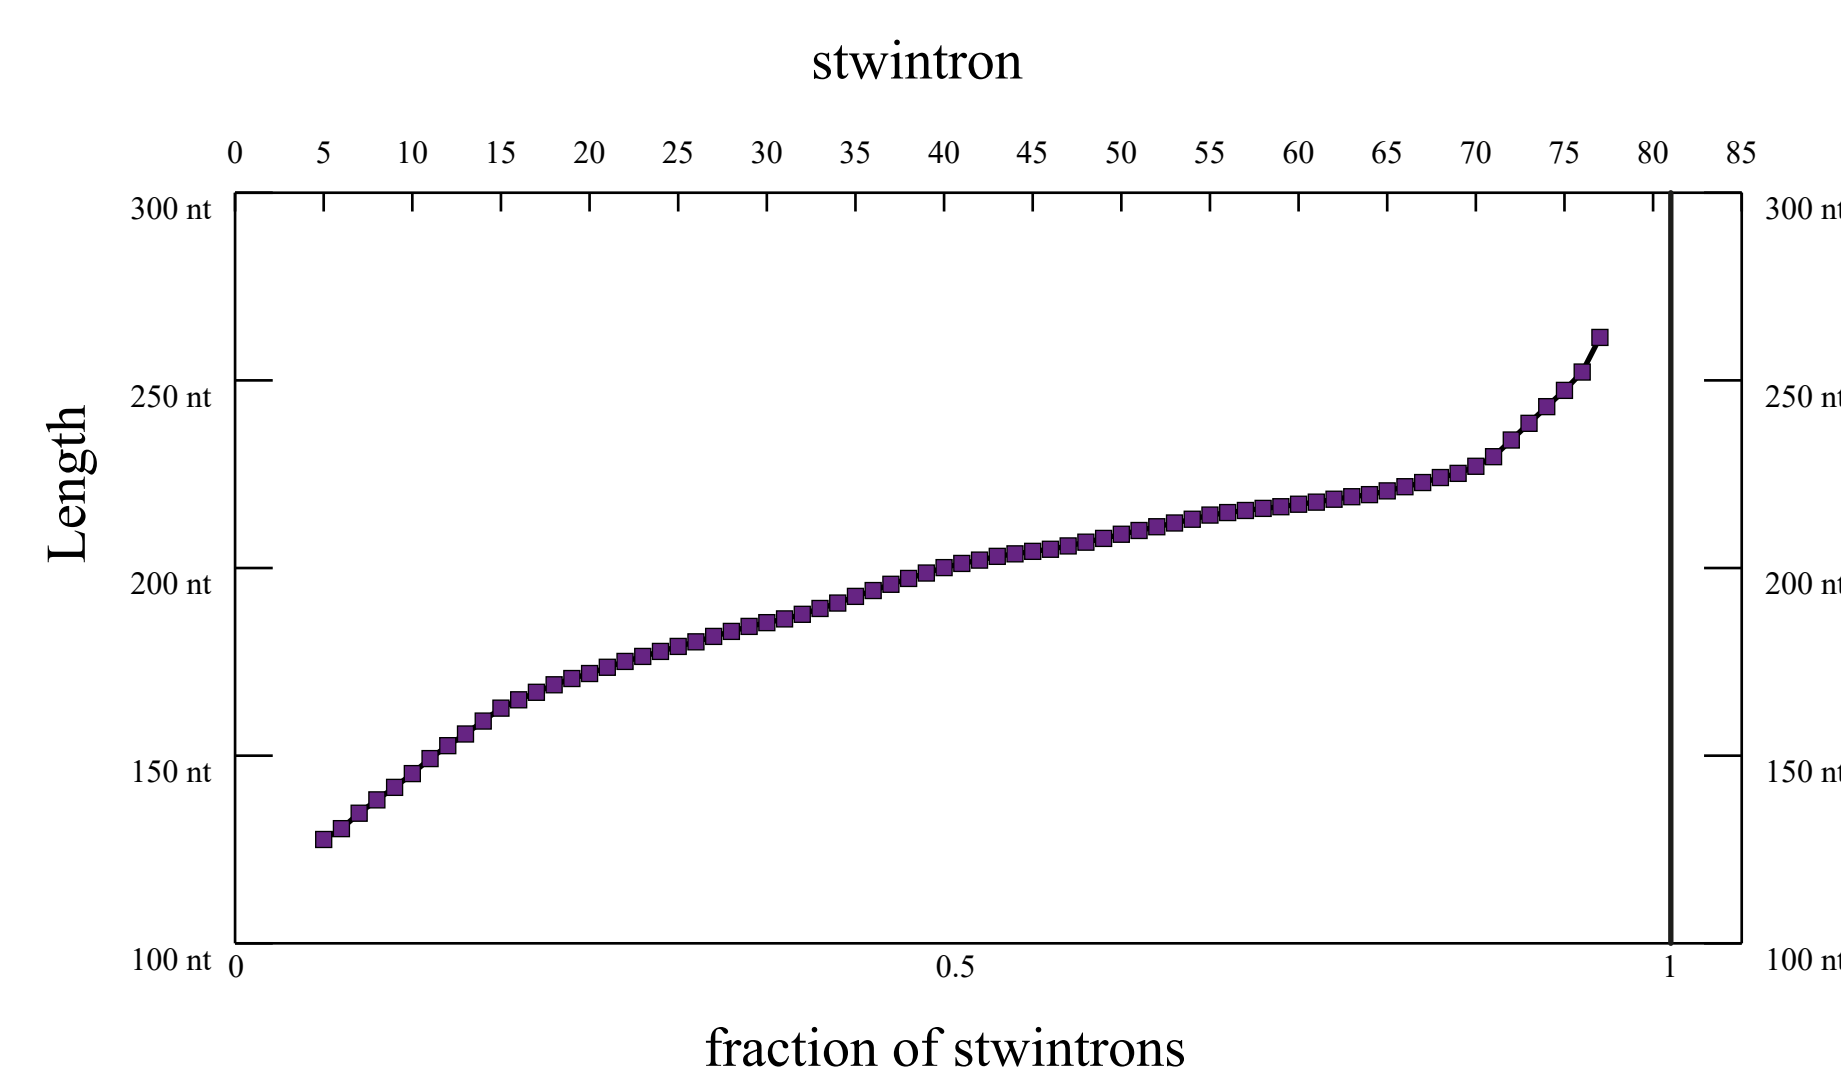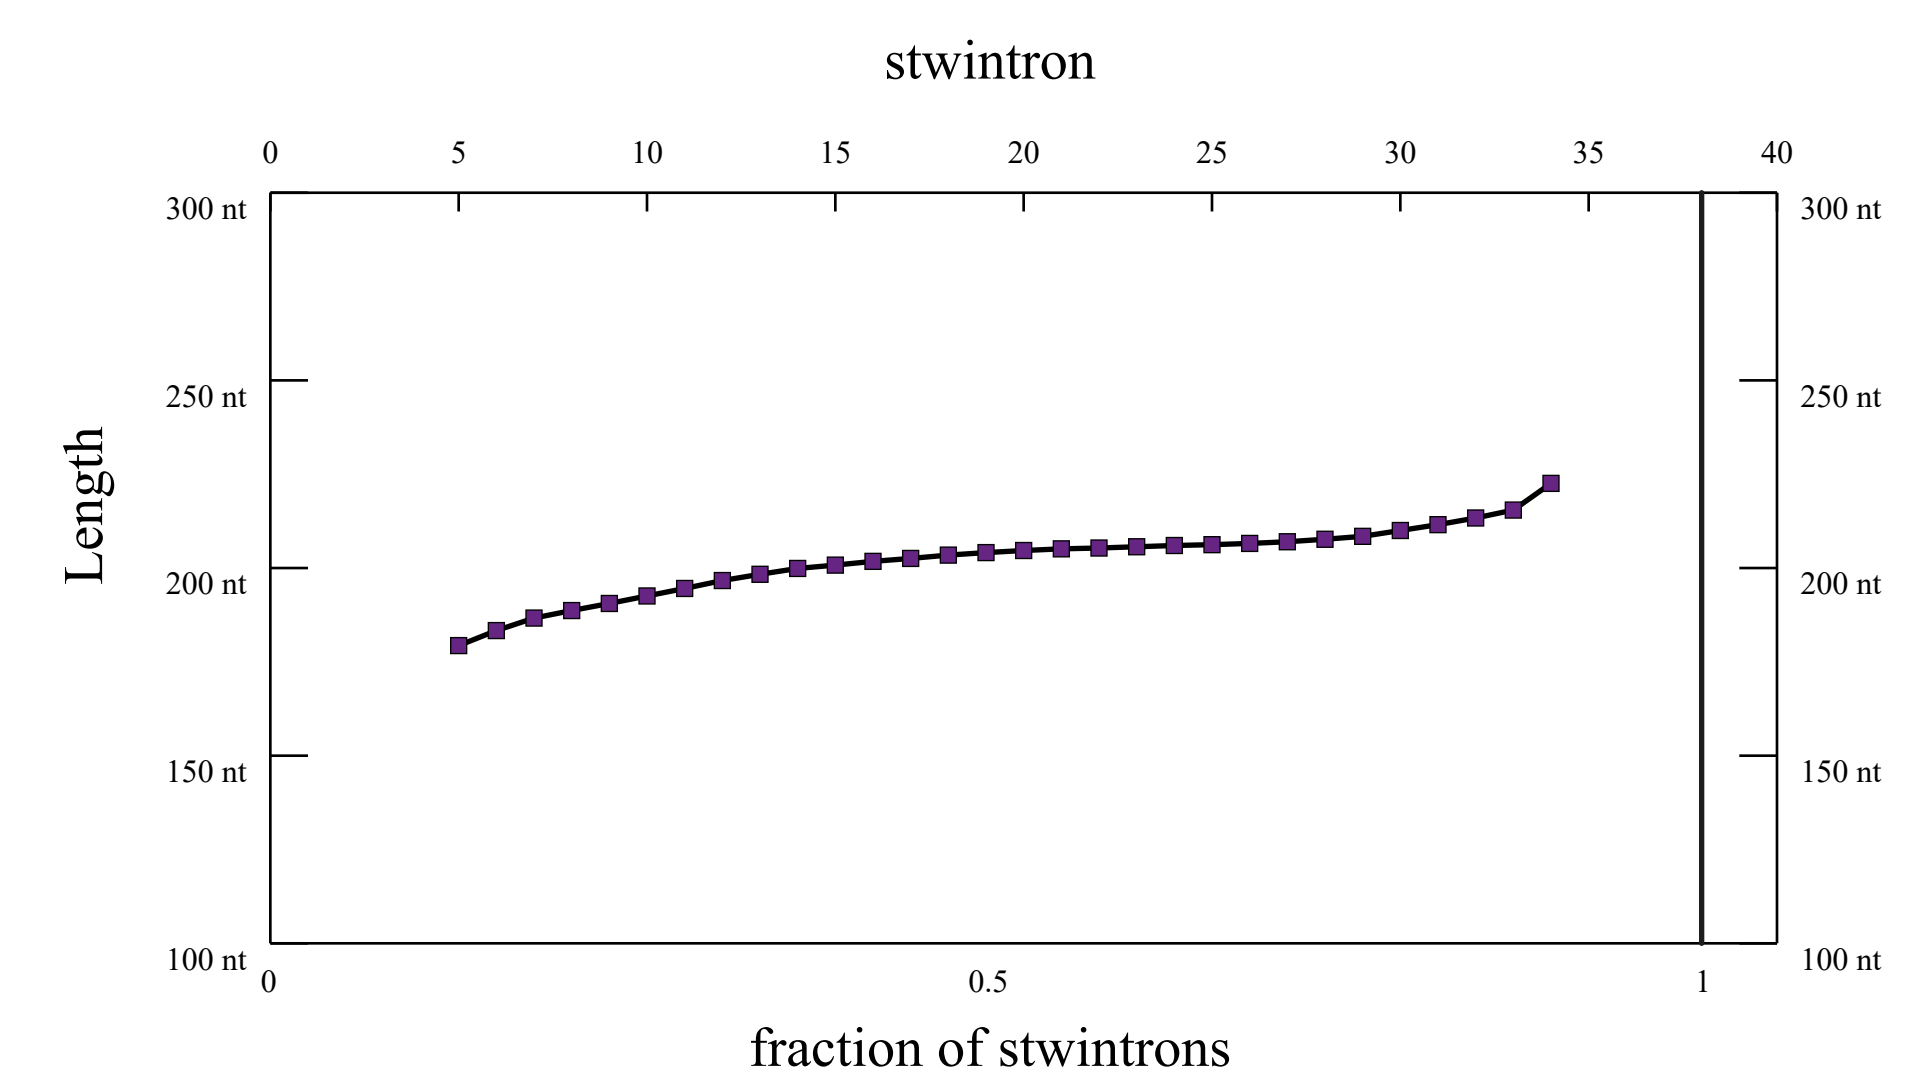

Internal introns

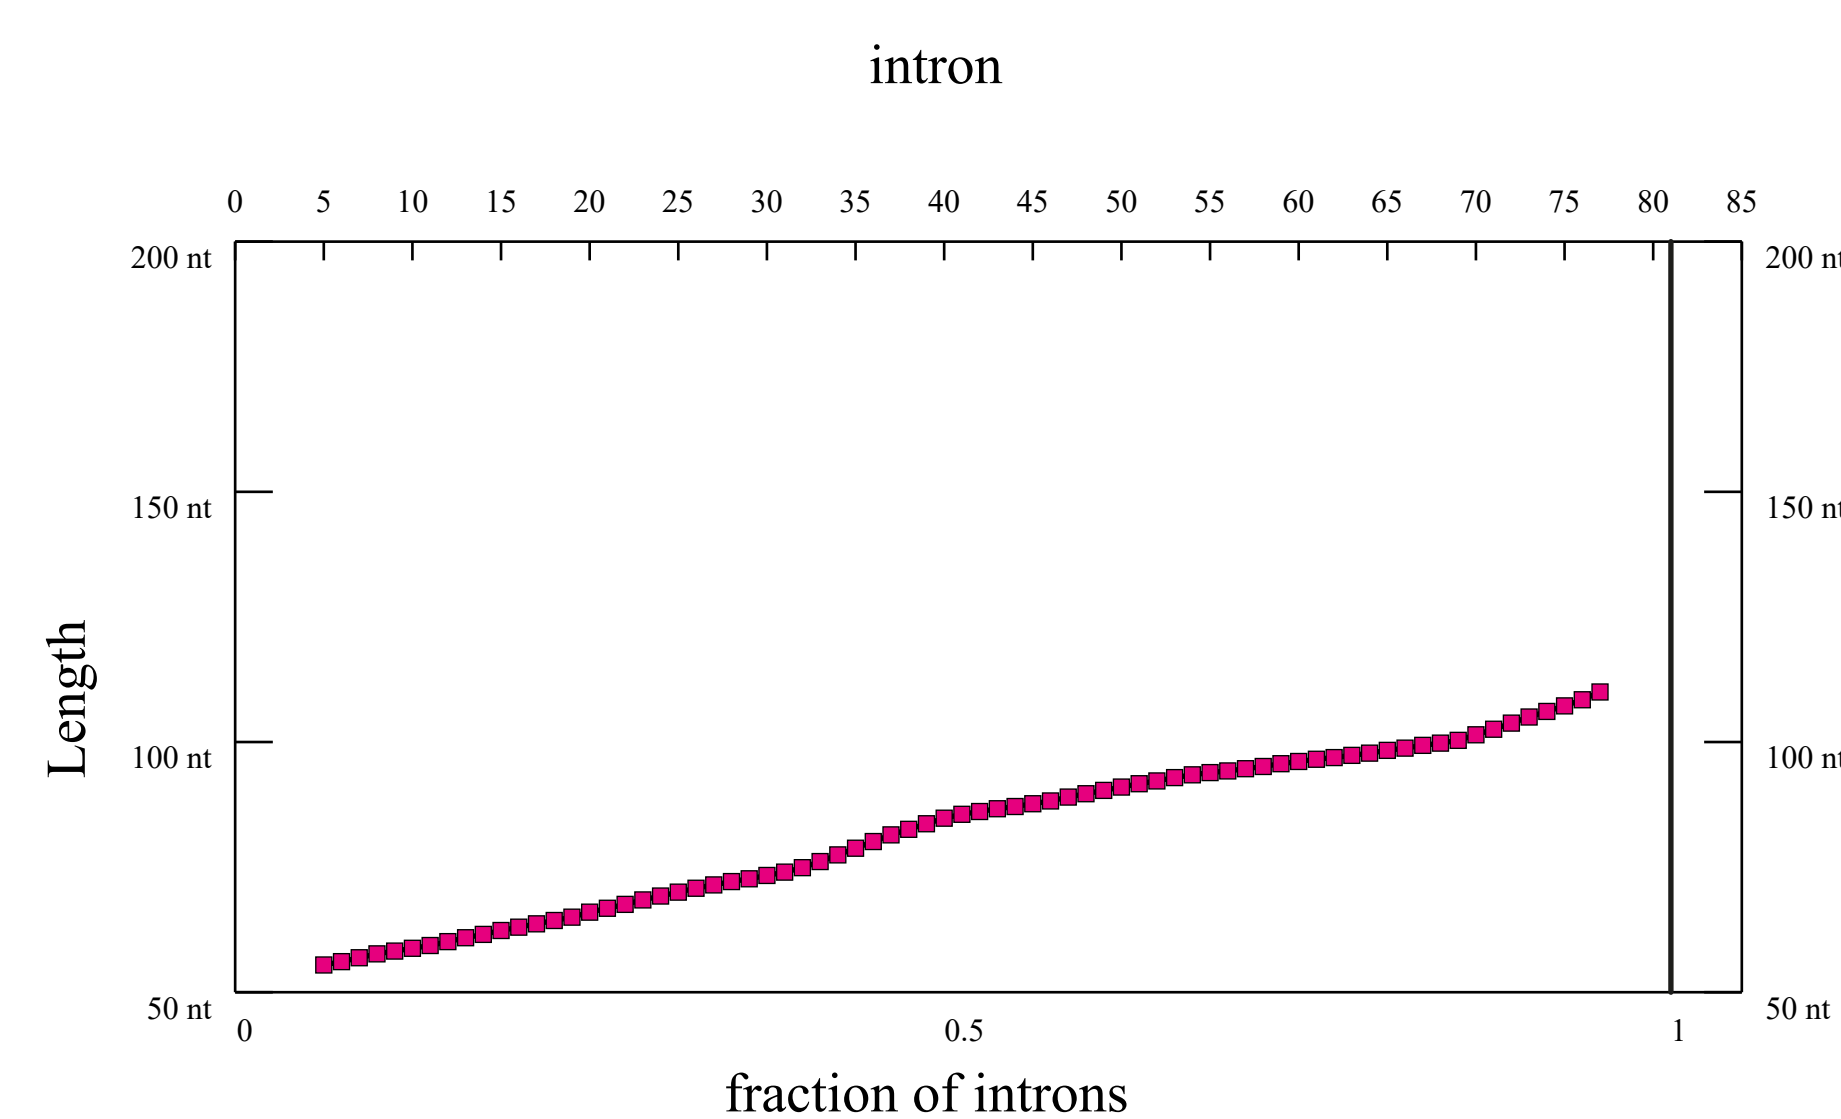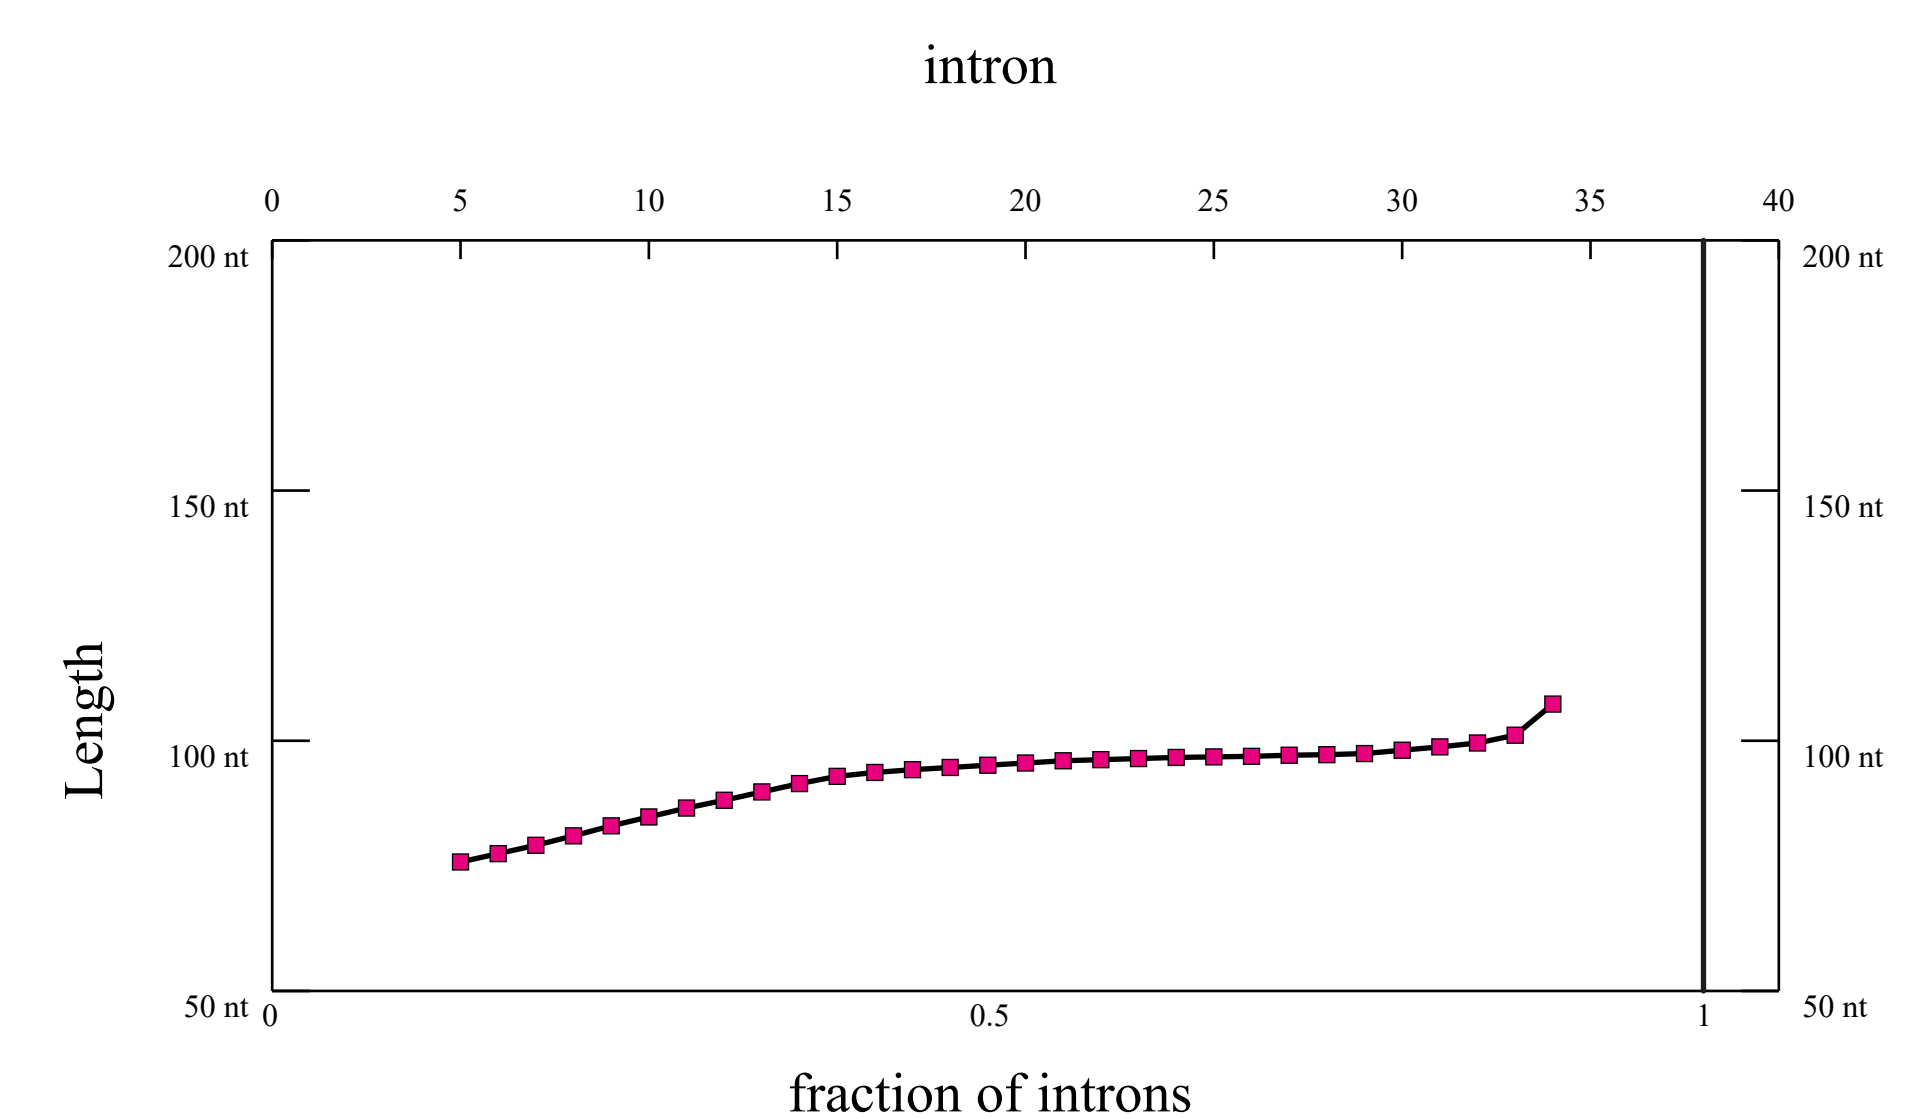

External introns

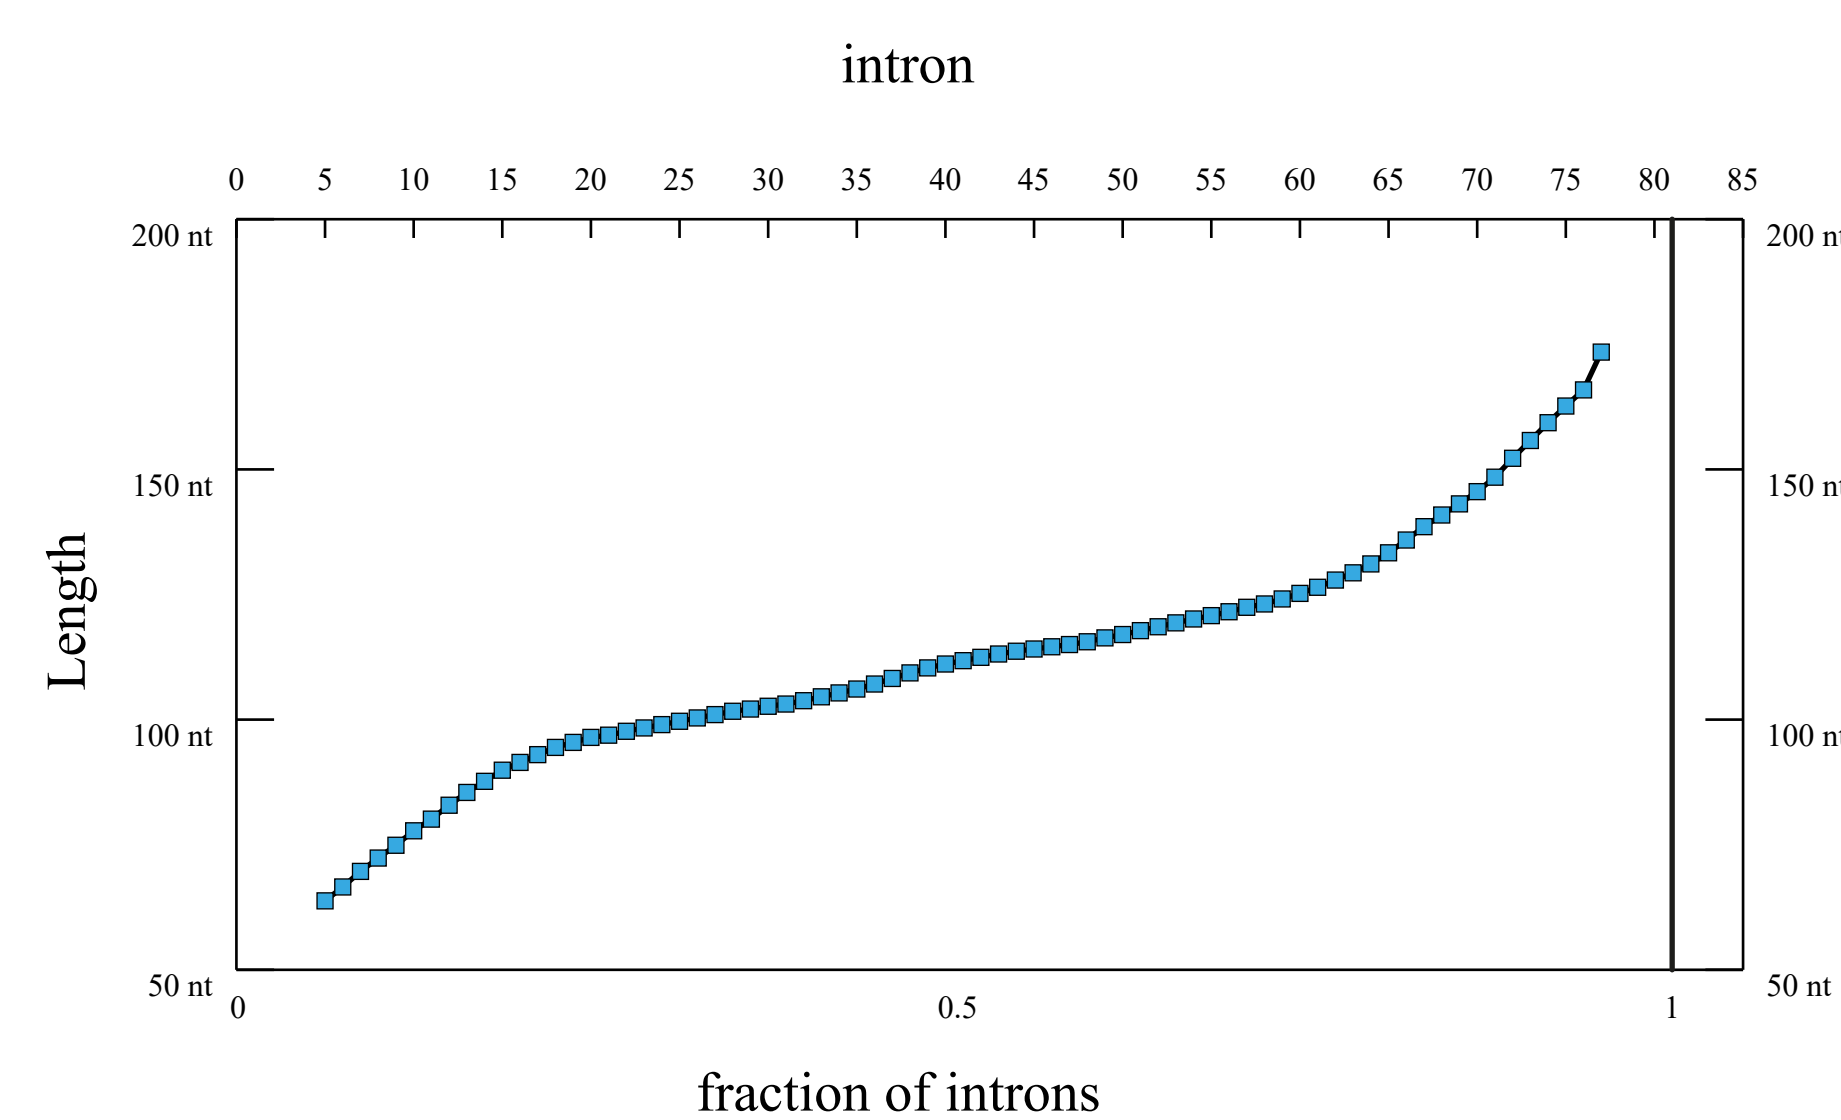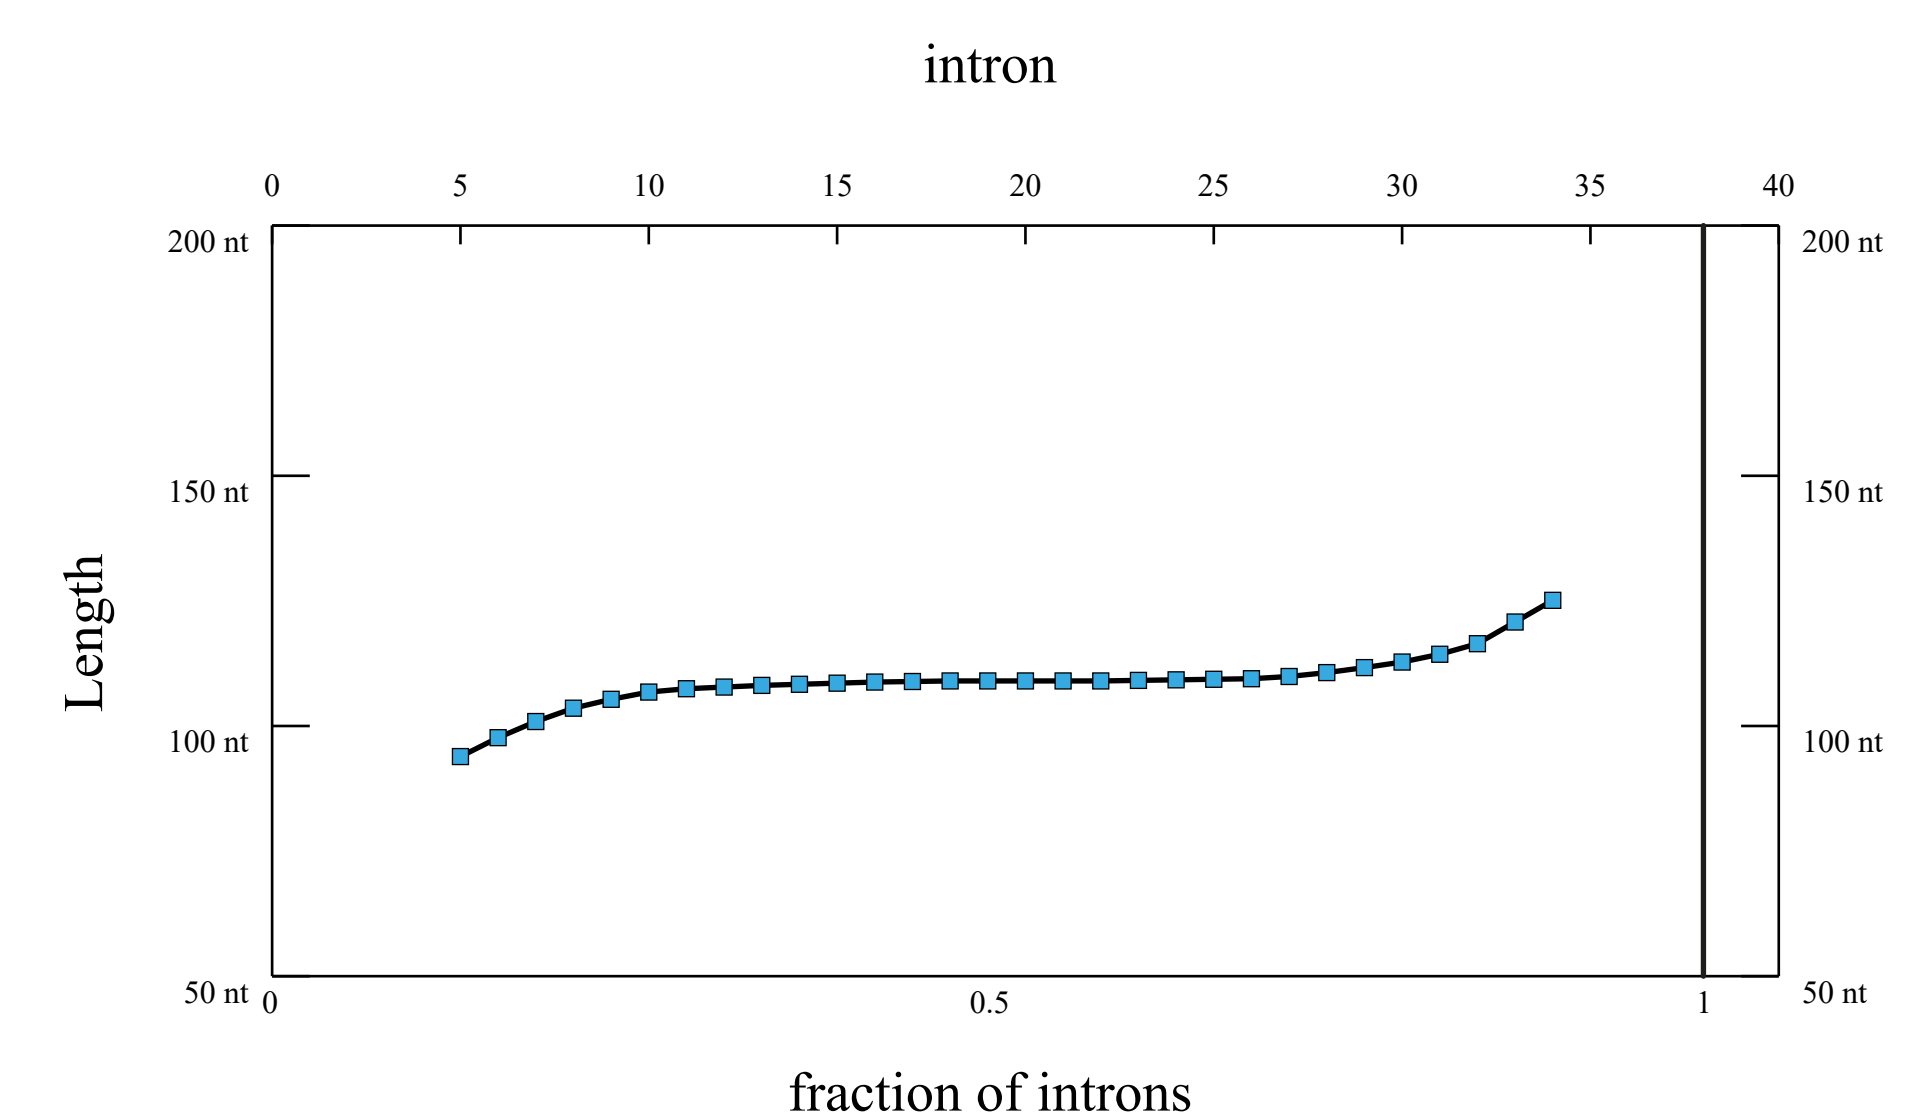

**Supplementary Figure S3.** Analysis of stwintron length and that of the constituting internal and external U2 introns for the two groups of [D1,2] stwintrons. **(a)** The top panels (six) show the crude data in histogram form specifying the number of stwintrons with one particular length [nt]. A moving average over a window of nine consecutive stwintrons ordered to increasing length was calculated for single step increments (red line). The mean lengths are given in the inlets at the top right of each of the six histograms. **(b)** In the bottom panels (six), incrementing moving averages of (stw)intron size (black, red and blue for the stwintrons, the internal introns and the external introns, respectively) were plotted against the fraction of stwintrons for each of the two groups.

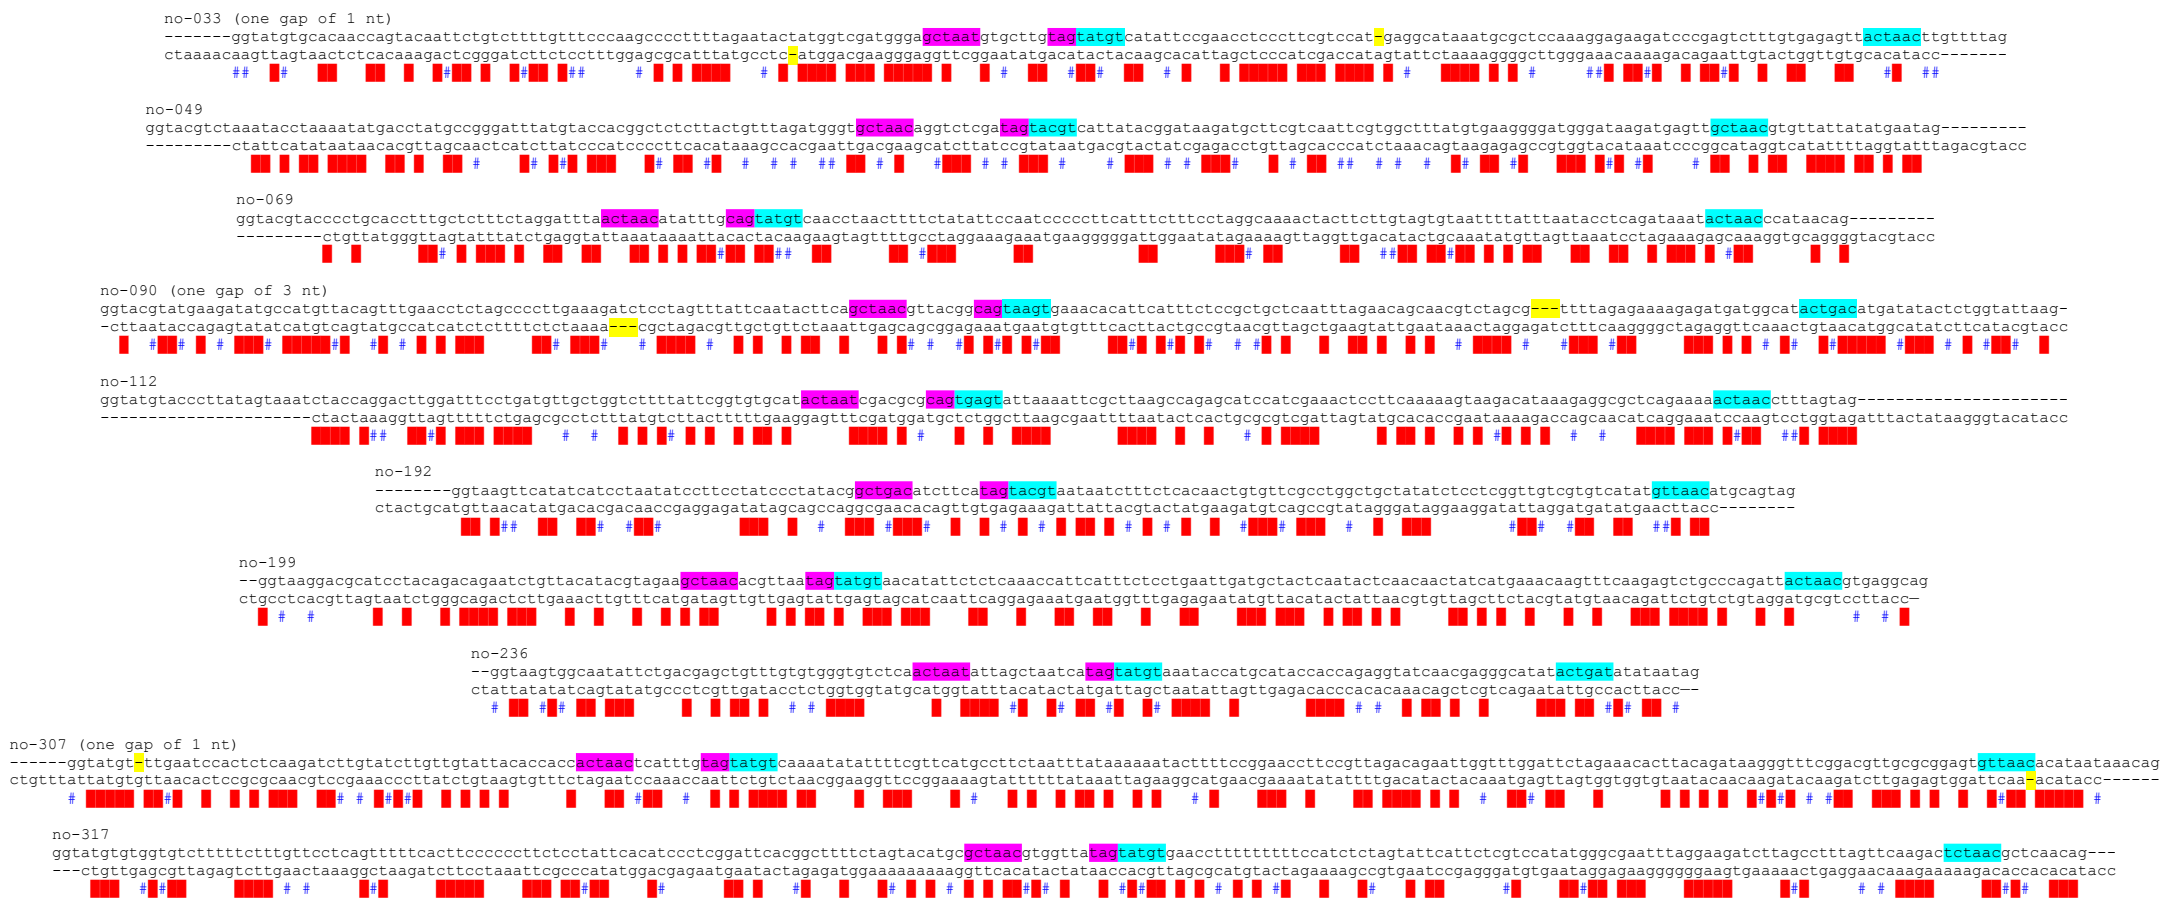

**Supplementary Figure S4.** Symmetry in ten of the uniquely occurring (evolutionary older) stwintrons in *Hypoxylon* sp. CO27-5 as revealed by the alignment of each of the stwintrons with its own reverse complement sequence. MAFFT alignments were carried out online, using E-INS-i iterative refinement and either of the PAM scoring matrices (200PAM; 20PAM; 1PAM). In some cases, the three scoring matrices giving the same alignment. Where multiple alignments with different symmetry midpoints were produced, alignments with the least introduced gaps and/or the shortest gap length were preferred over those where more aligned positions were obtained as a result of more extensive gap creation and elongation by the alignment program. The ten stwintrons depicted show modest overhangs beyond the symmetrical region at either the 5' or the 3' terminus. A **red square** below the aligned sequences denotes those positions in the alignment where the nt (irrespective of its identity) in the stwintron was the same as in its reverse complement sequence. The **blue # (number) sign** denotes those locations in the alignment where noncanonical GU or UG base pairing can occur in double-stranded sections. In these situations, a G in the stwintron sequence matches an A in its reverse complement sequence at the same position in the alignment, and a T in the stwintron sequence matches a C. In all other situations, the position was left white in the graphic two-dimensional scheme below the alignment. The stwintrons were aligned at the centre of the image, to achieve a visual effect of mirroring. In the reading strand of the stwintron, the 5'-donors, the BP sequence elements and the 3'-acceptor are highlighted magenta for the internal intron and turquoise for the external intron. With the possible exception of stwintron number no-049, the local symmetry (base pairing) is not particularly pronounced at the stwintron termini. In UO stwintrons, there appear to be no equivalents of the terminal inverted repeats that typically occur in most of the 25 propagating sister stwintrons (cf. [Fekete,2021]).



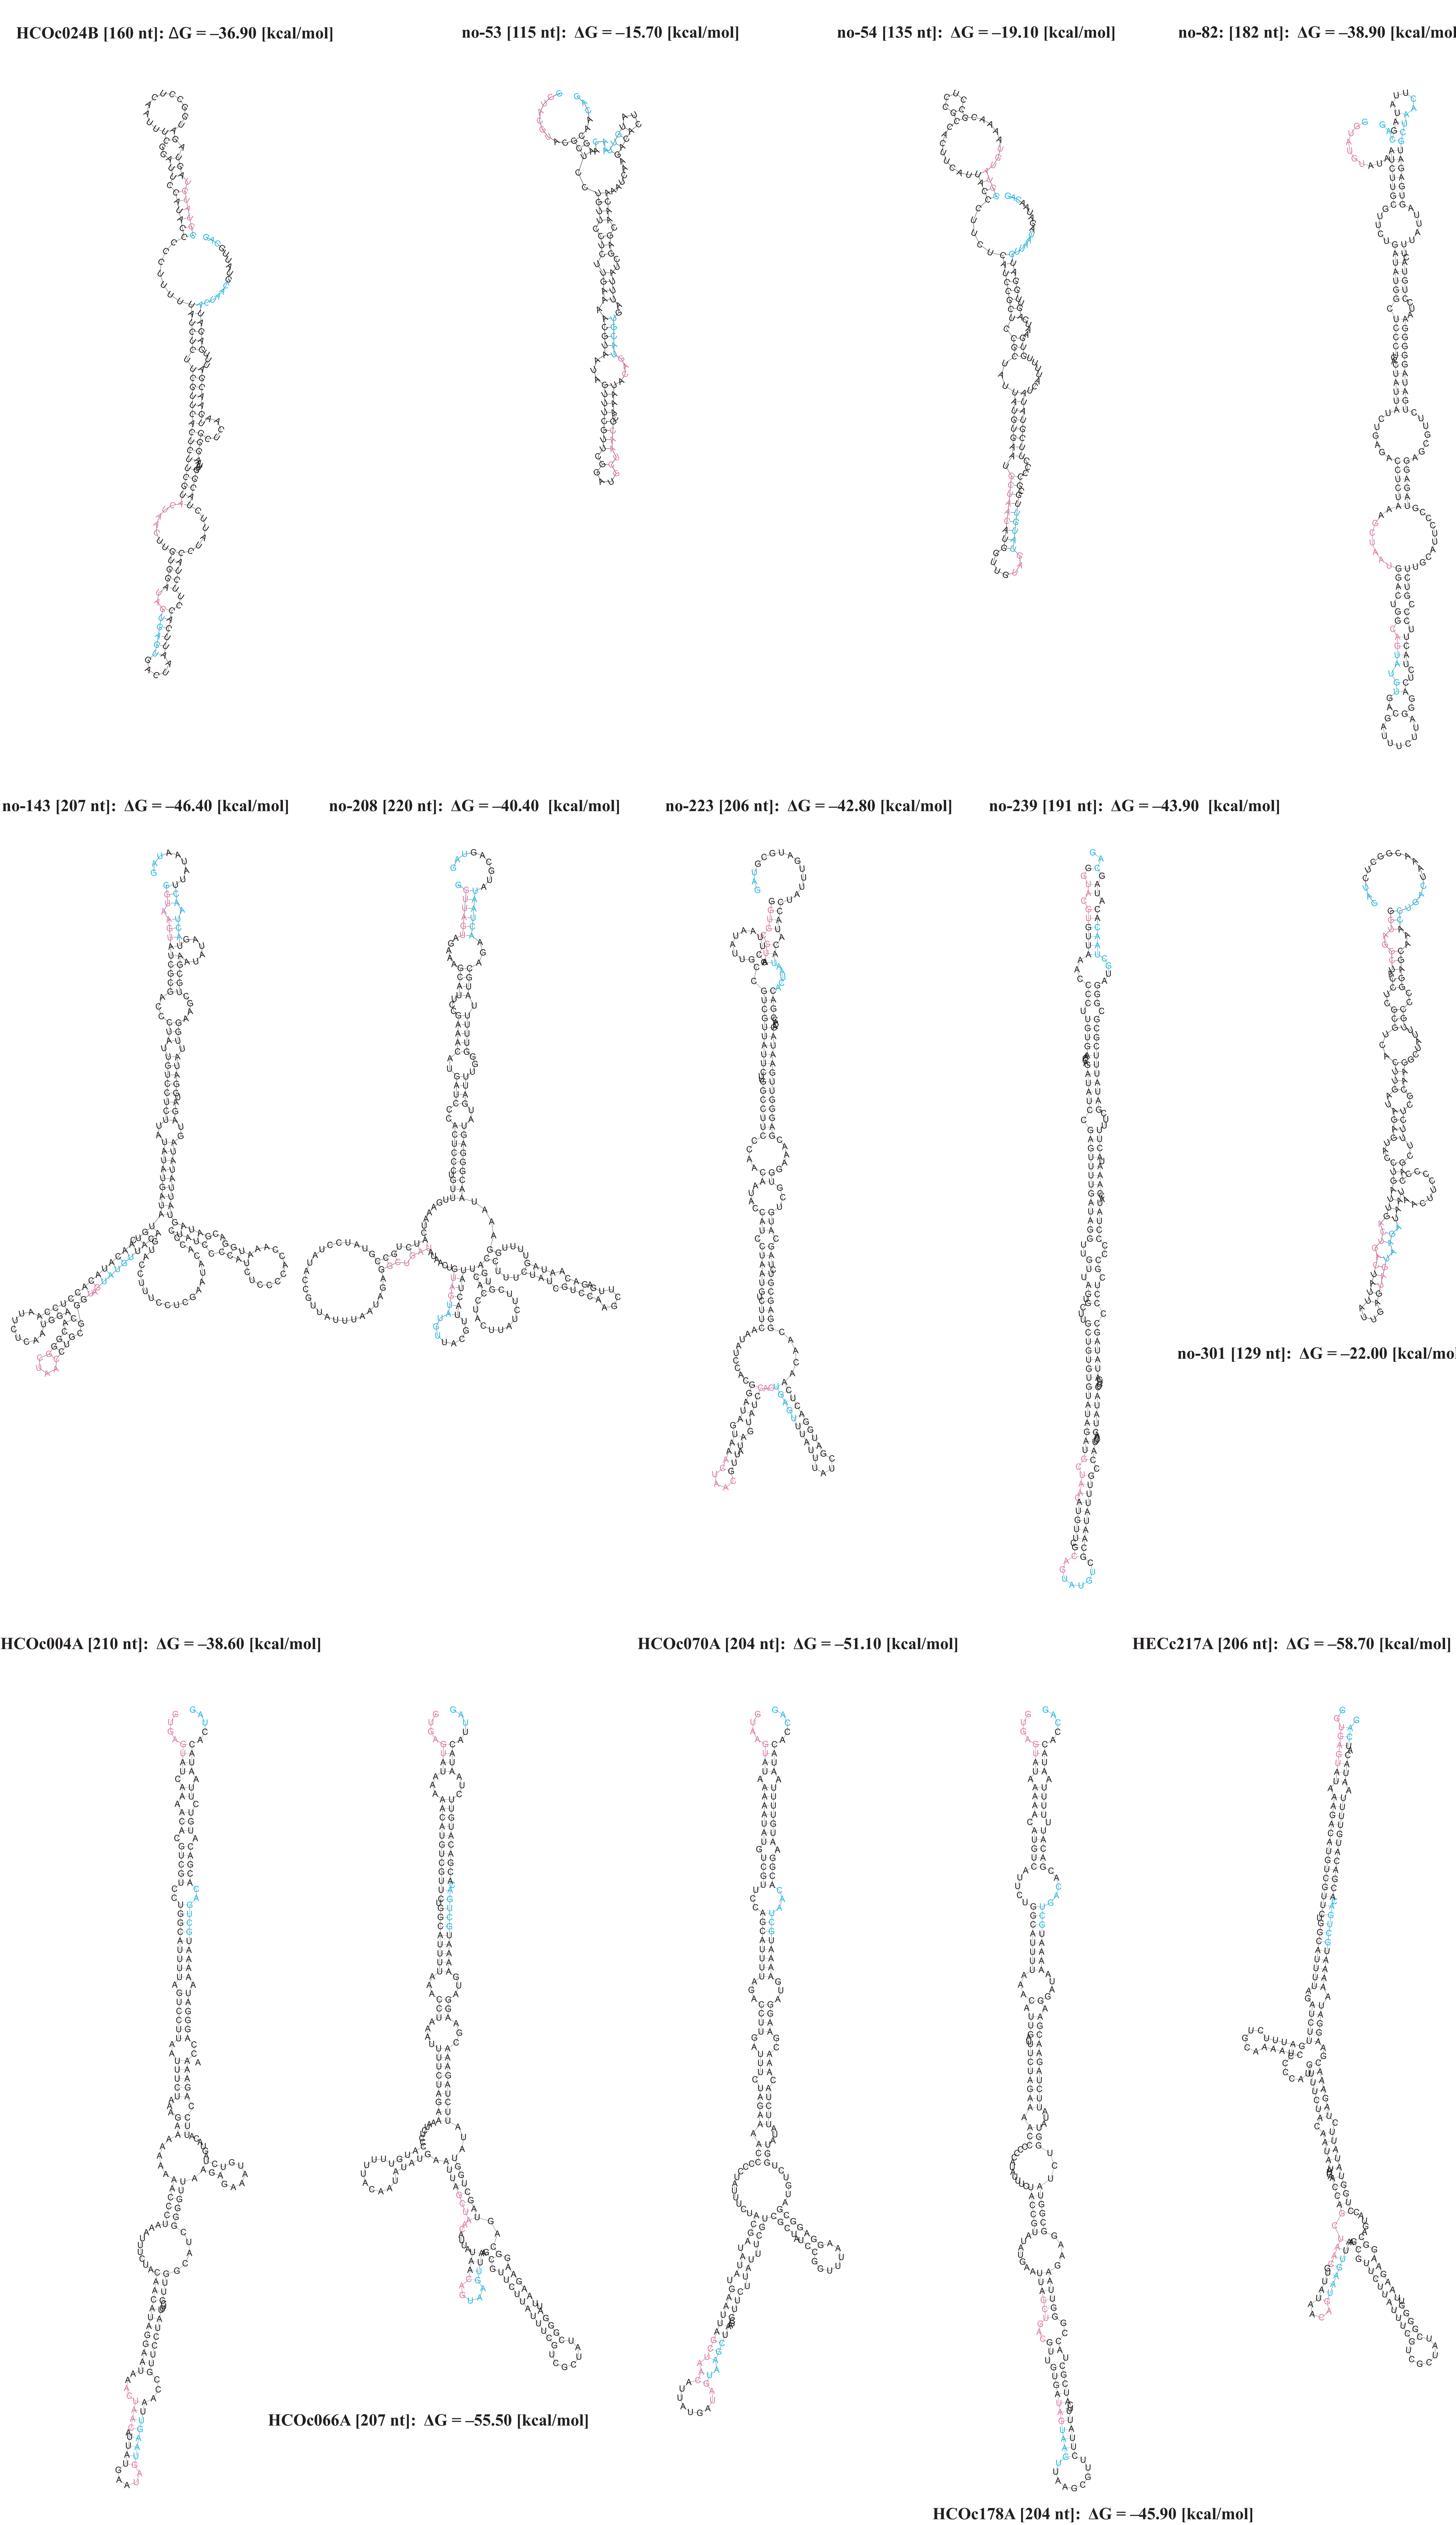

**Supplementary Figure S5.** Optimal secondary structures of nine *Hypoxylon* sp. CO27-5 stwintrons from the miscellaneous group of 81 stwintrons, identified in this work, compared to those of five *Hypoxylon* sp. CO27-5/EC38 sequence-similar sister stwintrons (structures at the bottom). Structures were predicted by RNAfold (default settings except that isolated base pairs were not avoided) and calculated minimal free energies ( $\Delta G$ ) for the proposed folding are included. 5'-Donors, BP sequence elements and 3'-acceptors were highligthed in coloured letters, magenta for the internal intron and turquoise for the external intron. Note that  $\Delta G$  values correlate positively with the size of the RNA.



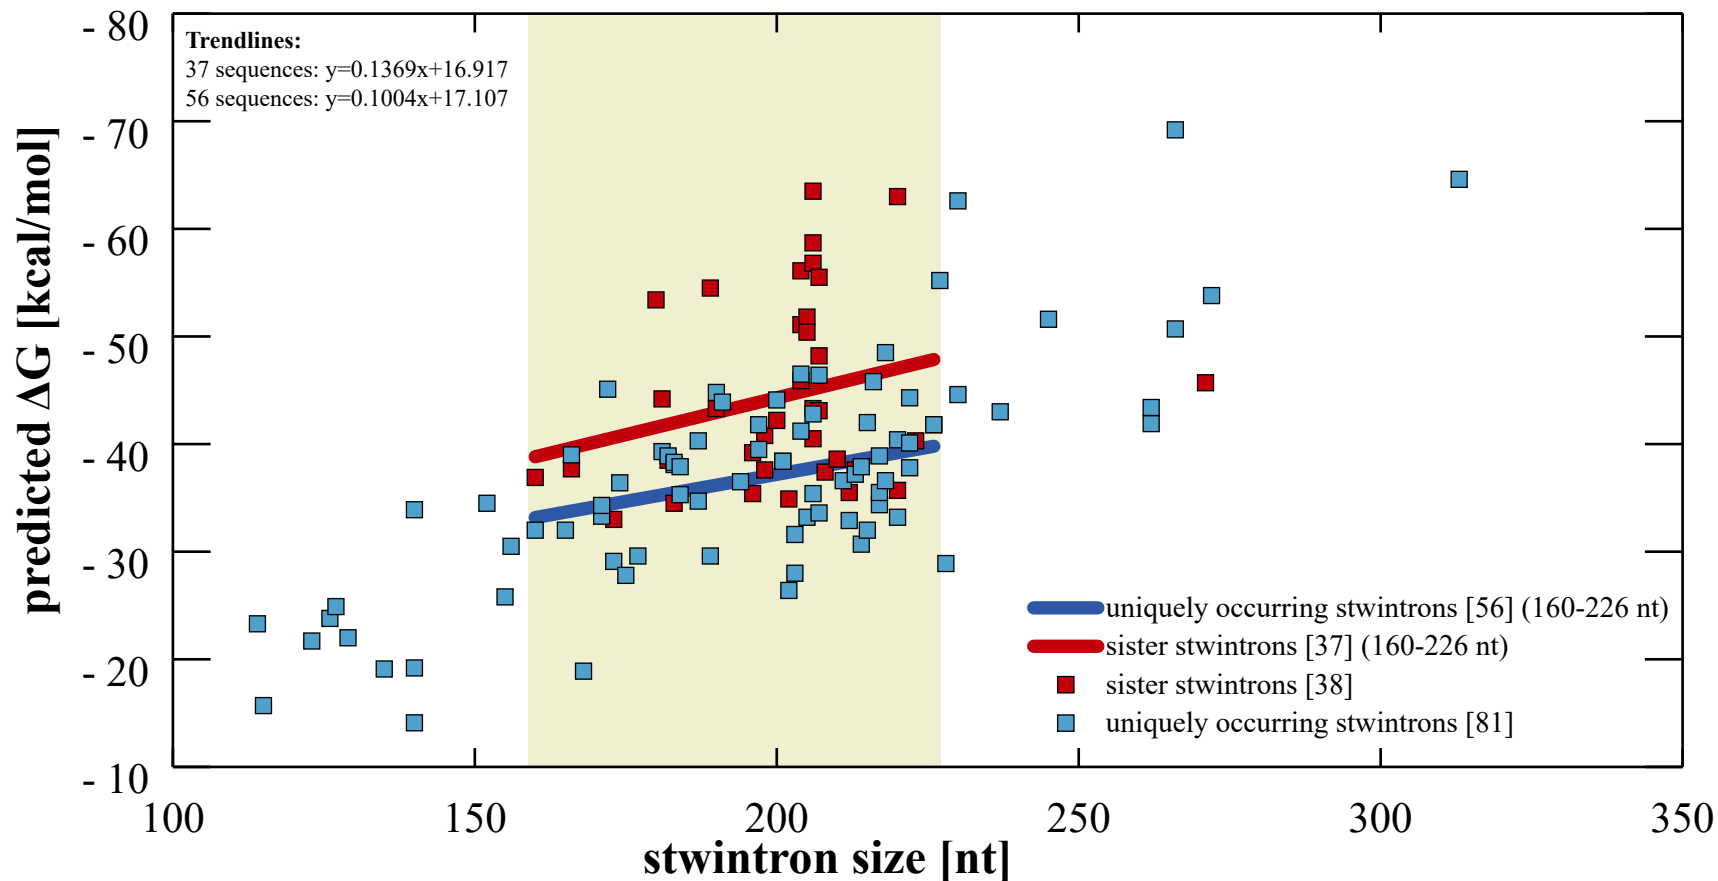

**Supplementary Figure S6.** Comparison of predicted minimum free energy ( $\Delta G$ ) levels for optimal secondary structure folding of sister stwintrons and the uniquely occurring (UO) stwintrons. The theoretical  $\Delta G$  values (minimum free energy of folding) were calculated for all 117 stwintrons with RNAfold and plotted against the stwintron length. The red squares represent the  $\Delta G$  data for the 38 sister stwintrons while the blue squares are those for the 81 UO stwintrons. There is no clear distinction for  $\Delta G$  values between the two groups of stwintrons. To define trend differences, we resorted to linear regression of the data within the length range between 160 nt and 226 nt, including 37 sister stwintrons and 56 UO stwintrons. The fitted trend lines (red and blue, respectively) suggest that on average, sister stwintrons have a 17–20 % lower predicted  $\Delta G$ , implying that their predicted secondary structures are somewhat more stable than those of UO (evolutionary older) stwintrons of similar length. 12 sister stwintrons (~ one third) have a lower  $\Delta G$  for the optimal secondary structure than any of the UO stwintrons of similar size. 18 stwintrons in the miscellaneous group of 81 UO stwintrons (also ~ one third) have higher  $\Delta G$  predicted than any sister stwintron of similar size.

# Supplementary Table S2. Oligonucleotide primers used in this study.

Oligonucleotide primers for cDNA and/or gDNA sequencing.

| Gene Hypoxylon sp. CO27-5 | Name of oligo | Sequence (5'-)         |
|---------------------------|---------------|------------------------|
| No 8                      | No8_seqF1     | CGACCATTCGATATTCACGA   |
| No 8                      | No8_seqR1     | AATGCTAGTCGAGGCACGAG   |
| No 8                      | No8_seqF2     | AGATCAGTTCGCGACAATCC   |
| No 8                      | No8_seqR2     | AGAAACCAATGCCGACAGAC   |
| No 37                     | No37_seqF1    | GACCGCTGATCCTTTTCGTC   |
| No 37                     | No37_seqR1    | TTCCCAAATCCGAACCTCCA   |
| No 37                     | No37_seqF2    | CCTGAAGAGAGTGTCAATACCG |
| No 37                     | No37_seqR2    | AGATAGCTCAGGGTTCGCAT   |
| No 50                     | No50_seqF     | GGACGCTGGACCAATTCCTC   |
| No 50                     | No50_seqR     | CAGCGGAGATCAGGTACCTA   |
| No 61                     | No61_seqF     | CGACACTTTGTGGACGGATA   |
| No 61                     | No61_seqR     | AGACCCAGCATCCTTAGCAA   |
| No 69                     | No69_seqF1    | CGAATTGGCTTCTTCGTCAC   |
| No 69                     | No69_seqR1    | TGCCGAAGAAATGGGGAATG   |
| No 69                     | No69_seqF2    | ACCCATCGTCCTTCTCTTCG   |
| No 69                     | No69_seqR2    | TCAAATGTACAACCACTGGCT  |
| No 77                     | No77_seqF1    | TTGGAACGAGGTACCAACAA   |
| No 77                     | No77_seqR1    | CTCGATATCCTGGGCCATAA   |
| No 77                     | No77_seqF2    | CGACGAGTCGTTGCTAAACA   |
| No 77                     | No77_seqR2    | CGTAGAAGCCTCTGGGACTG   |
| No 82                     | No82_seqF     | TTTTCCTGCCCGAGTTCTCA   |
| No 82                     | No82_seqR     | AACAGGTCTTGGCAAGTGTC   |
| No 90                     | No90_seqF1    | CCATGTAAGTTAATCAATCAG  |
| No 90                     | No90_seqR1    | TGTGTAACCGCAGATAACATA  |
| No 90                     | No90_seqF2    | TATGTTATCTGCGGTTACACA  |
| No 90                     | No90_seqR2    | CCGGCTAATAGTGCAAGGTGA  |
| No 100                    | No100_seqF    | AGGTAGCAGCCTGATCACGT   |
| No 100                    | No100_seqR    | TCTAACATGCCCAGTCGAGC   |
| No 132                    | No132_seqF1   | CTCCCAATTTTCGAAAGACGT  |
| No 132                    | No132_seqR1   | GTACCTATGCAAAGTAATTAC  |
| No 132                    | No132_seqF2   | GTATGCGTTATTGGGTGGCC   |
| No 132                    | No132_seqR2   | ACCTTCGCAGCTCTATGGTT   |
| No 133                    | No133_seqF    | ATCCGAGCGATCTCGCCGATC  |
| No 133                    | No133_seqR    | ATAGTTTGAAGCAACTGGGAG  |
| No 140                    | No140_seqF1   | GTGCTGTTTTGCGAAGGTCT   |
| No 140                    | No140_seqR1   | CAGCAGAGCCGACACATAAG   |
| No 140                    | No140_seqF2   | GCCTCCCAGATTCGGAAC     |
| No 140                    | No140_seqR2   | AAGCAAAGATACCTCCCCGTA  |
| No 155                    | No155_seqF1   | AGCTCAACATCCCATCACCA   |
| No 155                    | No155_seqR1   | TGTGTAAGTCTGCGTCGAGA   |
| No 155                    | No155_seqF2   | GAGGAGGACAAGGAACCACA   |



|        |             |                        |
|--------|-------------|------------------------|
| No 155 | No155_seqR2 | CCGCACACTCCTGATAAAGC   |
| No 177 | No177_seqF  | CTCTTGGTCTAGCCAGGTAA   |
| No 177 | No177_seqR  | GCGTTAGTTACGATGCCGAAAT |
| No 208 | No208_seqF1 | TGCAGAAGATCAGAGGTCGT   |
| No 208 | No208_seqR1 | CCGTCGGTCATAGGATGTCT   |
| No 208 | No208_seqF2 | ATGTCTCGGTACTTTTGCGG   |
| No 208 | No208_seqR2 | TTCATGTATCGCGTTTGGGC   |
| No 215 | No215_seqF  | CATAAACGCCAGATCCGCC    |
| No 215 | No215_seqR  | TGGCTTCCTCAACGGTACAT   |
| No 243 | No243_seqF  | AATACCTCATTCTGCTGGGC   |
| No 243 | No243_seqR  | CGCTCCTTACGTTCTGTCT    |
| No 279 | No279_seqF  | CCATTCAAGCTGCCCAATCA   |
| No 279 | No279_seqR  | TCCTACAGCGCTAAACCACT   |
| No 303 | No303_seqF1 | CCCTACCGAACCAGATAGTGT  |
| No 303 | No303_seqR1 | AGTGGCGGTGACAGAACTAT   |
| No 303 | No303_seqF2 | GAGGAATTCGTTGGTGCTCC   |
| No 303 | No303_seqR2 | TCATCCGTGGAAAGTAGAGCA  |
| No 304 | No304_seqF  | GGCAACGAAACATAAGTGACCT |
| No 304 | No304_seqR  | AGGTGCCTCTATATGTGGGG   |
| No 306 | No306_seqF  | CCCGCTTTCTAGTTCTAATC   |
| No 306 | No306_seqR  | AGAAATGCTTTTATCGCCGAC  |
| No 307 | No307_seqF1 | TCGCTGAAATGCTCCCAGAT   |
| No 307 | No307_seqR1 | TTAGAACCCCGTACCAGCTG   |
| No 307 | No307_seqF2 | ATCGGAAATCAGGGCCATCA   |
| No 307 | No307_seqR2 | TCAAAGAGAGGAGGCCGAAA   |
| No 309 | No309_seqF  | TTGCGGGGCACATATCATTTG  |
| No 309 | No309_seqR  | AGAGGTTCAAAGGCAGACGA   |
| No 311 | No311_seqF  | AACTACGGTACCCTGGTTGG   |
| No 311 | No311_seqR  | TCACAGTGTGGAATTGGCG    |

Oligonucleotide primers for RT-PCR verification of stwintron splicing intermediates.

| Gene Hypoxylon sp. CO27-5 | Name of oligo   | Sequence (5'-)          |
|---------------------------|-----------------|-------------------------|
| No 8                      | No8_splinterF   | TGGCGAACATCTTGTTGCT     |
| No 8                      | No8_splinterR   | AATTTTCGCCCCCTCGAATAAT  |
| No 37                     | No37_splinterF  | GACCGCTGATCCTTTTCGTC    |
| No 37                     | No37_splinterR  | AGCAGTGAAATGAGGTAGGACA  |
| No 50                     | No50_splinterF  | GGCAAGAGACACGGATCAAG    |
| No 50                     | No50_splinterR  | AGCAAGACTAGCACAAGGAGA   |
| No 69                     | No69_splinterF  | ACCCATCGTCCTTCTCTTCG    |
| No 69                     | No69_splinterR  | GCCTAGGAAAGAAATGAAGGGG  |
| No 71                     | No71_splinterF  | AGACCTTGTGCTGGATCGTT    |
| No 71                     | No71_splinterR  | GGGTAGAAAAGATGCAACGTCA  |
| No 77                     | No77_splinterF  | ACTTTCGTTTCGAGGGGTTTT   |
| No 77                     | No77_splinterR  | TTGACCACGAGAACAAGAGC    |
| No 82                     | No82_splinterF  | TCAAGTTGGATGCGGTGATC    |
| No 82                     | No82_splinterR  | TGCAAGACGGGAAGTAGAGT    |
| No 90                     | No90_splinterF  | TATGTTATCTGCGGTTACAC    |
| No 90                     | No90_splinterR  | CAGAGTATATCATGTCAGTAT   |
| No 100                    | No100_splinterF | ATCGGAGTTCCCTGTTTGCT    |
| No 100                    | No100_splinterR | GACCCTAAACTTCCATGTCCG   |
| No 115                    | No115_splinterF | GGAGGCCGAGCTCAAAGATA    |
| No 115                    | No115_splinterR | GCCAAAGTTGAGAAGAAGGGA   |
| No 132                    | No132_splinterF | TTGCGAAAGCCGTCGAGCTC    |
| No 132                    | No132_splinterR | CTGGACATCAGCATTGGAGTTC  |
| No 133                    | No133_splinterF | CGACTGACCAATTAAAGGCC    |
| No 133                    | No133_splinterR | GTATGATTAGCAACCCTCAT    |
| No 140                    | No140_splinterF | GGGGAATGCTCACCATTGTT    |
| No 140                    | No140_splinterR | ATTAGCGAAGAACGCGAAAG    |
| No 155                    | No155_splinterF | CGCATCGACATTCCGGAATG    |
| No 155                    | No155_splinterR | TTCGTGCCAAGATGCGTATG    |
| No 174                    | No174_splinterF | TCCAACCTCTACCCCGTCAC    |
| No 174                    | No174_splinterR | GCTCCTCCTTCTCTTTGGCT    |
| No 177                    | No177_splinterF | CTCTTGGTCAGCCCAGGTAA    |
| No 177                    | No177_splinterR | CCGAATGAAAATCGGTGGTA    |
| No 189                    | No189_splinterF | AAGATTCGAGCTTGGGTCCA    |
| No 189                    | No189_splinterR | CGCCTTTGATGATTTGACATGT  |
| No 208                    | No208_splinterF | CTGGTGGTTATGGCTGGAGA    |
| No 208                    | No208_splinterR | AACCCAAATCATACTCCCCTT   |
| No 215                    | No215_splinterF | CATAAACGCCAGATCCGCC     |
| No 215                    | No215_splinterR | TTCCGATTAAGCCCCCTGTGT   |
| No 243                    | No243_splinterF | TGAAAGCGCTCAATGATCCG    |
| No 243                    | No243_splinterR | TTCGTTAGTAAGCGTCTCATGTG |
| No 279                    | No279_splinterF | TCCCAGTTCTTCTGACGGAC    |
| No 279                    | No279_splinterR | GAAAGCTCGTAGTTGTCCCC    |

|        |                 |                        |
|--------|-----------------|------------------------|
| No 301 | No301_splinterF | CGCCTCGGTTGTTTCAGAAA   |
| No 301 | No301_splinterR | GCCGTTTTCAGTCAGGTTTGCT |
| No 302 | No302_splinterF | AGGCAGCCAGGATTAATTGC   |
| No 302 | No302_splinterR | TGGGAAAGAGGAAGCGTAGA   |
| No 303 | No303_splinterF | CCCTACCGAACCAGATAGTGT  |
| No 303 | No303_splinterR | AGATCAACACTACGGGAGGA   |
| No 306 | No306_splinterF | CCCGCTTTCTAGTTCCTAATC  |
| No 306 | No306_splinterR | GAGACGCAGGTGTTTGGATC   |
| No 311 | No311_splinterF | AACTACGGTACCCTGGTTGG   |
| No 311 | No311_splinterR | TTTTCCCTTCACGGCGCA     |



**Table S3.** RNA SRA reads confirming alternative splicing of [D1,2] stwintrons by one splicing reaction between the distal 5'- and 3'-splice sites, leaving the stwintron's 5'-G<sub>1</sub> exonic (frameshift +1).

| Stwintron number    | JGI read (>jgi HypCO275_1)      | SRA read (NCBI)     |
|---------------------|---------------------------------|---------------------|
| HCOc004A no-3       | 247537 CE158765_624:240-369     | SRR1801288.17896446 |
| HCOc017A no-270     | 120064 CE31292_1266:794-921     |                     |
| HCOc017B no-271     | 119130 CE30358_773:2014-2109    |                     |
| HCOc047A no-249     | 257094 CE168322_472:629-780     |                     |
| HCOc052A no-245     | 265540 CE176768_679:351-453     |                     |
| HCOc061A no-39      | 279437 CE190665_61:242-336      |                     |
| HCOc066A no-43      | 287660 CE198888_3359:1295-1517  |                     |
| HCOc070A no-233     | 293988 CE205216_93:1-173        |                     |
| HCOc102A no-218     | 341221 CE252449_2813:235-431    |                     |
| HCOc236A no-117     | 187281 CE98509_2931:661-861     | SRR1801290.14509435 |
| HCOc271A no-156     |                                 | SRR1801290.13818186 |
| HCOc332A no-131     | 237704 CE148932_72:776-962      |                     |
| HCOc378A no-134     | 254955 CE166183_478:339-438     | SRR1801290.31839927 |
| HCOc406A no-141     | 263616 CE174844_102:715-900     |                     |
| HCOc522A no-144     | 286513 CE197741_184:551-683     |                     |
| HCOc016A no-15      | 105281 CE16509_28:279-386       |                     |
| HCOc016B no-17      | 105936 CE17164_560:227-377      |                     |
| HCOc024B no-25      | 168552 CE79780_11486:1568-1690  |                     |
| HCOc046A no-250     | 256095 CE167323_275:295-399     |                     |
| HCOc091A<br>[no-nu] | 328600 CE239828_25:158-290      |                     |
| HCOc159A no-90      | 122447 CE33675_2831:1185-1385   |                     |
| HCOc304A no-129     | 223664 CE134892_1656:808-971    |                     |
| HCOc103A<br>[no-nu] | 342627 CE253855_94:52-156       |                     |
| 7                   | 332912 CE244140_201:140-296     |                     |
| 8                   | 346406 CE257634_424:1164-1268   |                     |
| 14                  | 105179 CE16407_251:1339-1539    |                     |
| 19                  | 130513 CE41741_52:757-921       |                     |
| 22                  | 150822 CE62050_1910:1382-1582   |                     |
| 29                  | 214722 CE125950_1394:303-513    |                     |
| 33                  | 262838 CE174066_647:698-921     |                     |
| 27                  | 269919 CE181147_260:1-184       |                     |
| 44                  | 288307 CE199535_2228:207-407    |                     |
| 48                  | 302454 CE213682_1650:431-540    |                     |
| 50                  | 309557 CE220785_1327:132-332    |                     |
| 54                  | 327120 CE238348_692:280-468     |                     |
| 61                  | 341505 CE252733_11:50-177       |                     |
| 69                  | 351606 CE262834_13216:1833-1991 |                     |
| 71                  | 357575 CE268803_515:255-358     |                     |
| 74                  | 360839 CE272067_1497:1583-1654  |                     |
| 77                  | 369120 CE280348_739:255-409     |                     |
| 90                  | 122447 CE33675_2831:1185-1385   |                     |
| 91                  | 123793 CE35021_98:374-487       |                     |

|     |        |                         |                     |
|-----|--------|-------------------------|---------------------|
| 100 | 146315 | CE57543_8577:732-887    |                     |
| 112 | 176189 | CE87417_2708:375-431    |                     |
| 115 | 183209 | CE94437_6:3-275         |                     |
| 124 | 206896 | CE118124_21363:510-612  |                     |
| 125 | 207196 | CE118424_1208:114-209   |                     |
| 132 | 237960 | CE149188_2825:1076-1145 |                     |
| 133 | 241731 | CE152959_667:1308-1393  |                     |
| 136 | 255988 | CE167216_15939:353-414  |                     |
| 143 | 272690 | CE183918_691:40-111     |                     |
| 155 | 216632 | CE127860_2554:664-765   |                     |
| 192 | 133496 | CE44724_4179:73-281     |                     |
| 199 | 110816 | CE22044_1283:1997-2104  |                     |
| 200 | 108791 | CE20019_6740:195-395    |                     |
| 202 | 101825 | CE13053_135:224-335     |                     |
| 208 | 366423 | CE277651_87:79-159      | SRR1801289.27881864 |
| 215 | 352635 | CE263863_47:103-252     |                     |
| 232 | 305569 | CE216797_9386:1439-1496 |                     |
| 234 | 293941 | CE205169_1567:625-753   |                     |
| 236 | 292136 | CE203364_100:443-532    |                     |
| 238 | 289275 | CE200503_1:7-78         |                     |
| 241 | 271706 | CE182934_31481:1-118    |                     |
| 243 | 270072 | CE181300_461:30-128     |                     |
| 279 | 247464 | CE158692_1:1-101        |                     |
| 300 | 125672 | CE36900_402:423-623     |                     |
| 301 | 247549 | CE158777_93:564-780     |                     |
| 302 | 357547 | CE268775_113:334-432    |                     |
| 306 | 155620 | CE66848_2129:641-845    |                     |
| 307 | 269137 | CE180365_34:263-347     |                     |
| 311 | 129693 | CE40921_1533:374-470    |                     |
| 312 | 196936 | CE108164_2149:253-423   |                     |
| 313 | 251091 | CE162319_1704:229-343   |                     |
| 314 | 206866 | CE118094_1518:309-447   |                     |
| 315 | 217032 | CE128260_178:708-862    |                     |
| 316 |        |                         | SRR1801287.4140706  |
| 317 | 359495 | CE270723_10319:506-669  |                     |
| 318 | 338896 | CE250124_850:1615-1811  | SRR1801292.18936684 |
| 319 | 138423 | CE49651_4453:1220-1434  | SRR1801292.16737170 |
| 320 | 114221 | CE25449_357:632-787     |                     |
| 321 | 102312 | CE13540_573:2-202       |                     |

Where multiple reads were extant, only one is given.
